# Supplementary material for: A Novel Guanine Elicitor Stimulates Immunity in Arabidopsis and Rice by Ethylene and Jasmonic Acid Signaling Pathways
Source: Front Plant Sci. 2022 Feb 17;13:841228. doi: 10.3389/fpls.2022.841228 (PMC8893958; doi:10.3389/fpls.2022.841228)
Supplement: Supplementary file 4 [file Data_Sheet_1.xlsx]

## Sheet: Sheet1
	Ion mode	Q1 (Da)	Molecular Weight (Da)	Ionization model	KEGG ID	Compounds	Class	物质	物质类别	1	2
pma0134	Positive	121	120.04	[M+H]+	-	D(-)-Threose	Carbohydrates	D(-)-苏阿糖	糖类	540000	849000
pma0461	Positive	277.2	276.22	[M+H]+	-	"14,15-Dehydrocrepenynic acid"	Lipids	"14,15-脱氢还阳参油酸"	脂质	4720000	11400000
pma2681	Positive	206.1	205.1	[M+H]+	C02470	Xanthurenic acid	Organic acids and derivatives	黄尿酸	有机酸及衍生物	112000	931000
pma2987	Positive	142.1	141.1	[M+H]+	C00860	Histidinol	Alcohols	组氨醇	醇类	30900000	39000000
pma3606	Positive	295.2	294.2	[M+H]+	-	"9-Hydroxy-(10E,12Z,15Z)-octadecatrienoic acid"	Lipids	"9-羟基-(10E,12Z,15Z)十八碳三烯酸"	脂质	29500000	3010000
pma3649	Positive	132.1	131.1	[M+H]+	C00430	5-Aminolevulinate	Organic acids and derivatives	5-氨基酮戊酸盐	有机酸及衍生物	130000000	266000000
pma6455	Negative	229	230.02	[M-H]-	C00117	Ribulose-5-phosphate	Carbohydrates	核酮糖-5-磷酸	糖类	153000	281000
pmb0115	Positive	225.1	224.1	[M+H]+	C02794	3-Hydroxykynurenine	Amino acid and derivatives	3-羟基犬尿素	氨基酸及衍生物	668000	27700
pmb0128	Positive	213.3	212.3	[M+H]+	-	delta-Tridecalactone	Lipids	十三烷内脂	脂质	74600	9
pmb0130	Positive	203	202	[M+H]+	-	N-Acetyl tryptamine	Phenolamides	乙酰色胺	酚胺	282000	208000
pmb0149	Positive	351	350	[M+H]+	-	MAG (18:4) isomer1	Lipids	单酰甘油酯 (酰基 18:4) 异构1	脂质	1400000	9
pmb0159	Positive	696.4	695.4	[M+H]+	-	DGMG (18:2) isomer2	Lipids	单酰甘油酯二糖 (18:2) 异构2	脂质	9	137000
pmb0160	Positive	353.3	352.3	[M+H]+	-	MAG (18:3) isomer5	Lipids	单酰甘油酯 (酰基 18:3) 异构5	脂质	31300	1400000
pmb0161	Positive	696.4	695.4	[M+H]+	-	DGMG (18:2) isomer1	Lipids	单酰甘油酯二糖 (18:2) 异构1	脂质	7340	842000
pmb0163	Positive	696.4	695.4	[M+H]+	-	DGMG (18:2) isomer3	Lipids	单酰甘油酯二糖 (18:2) 异构3	脂质	5200	848000
pmb0164	Positive	355.1	354.1	[M+H]+	-	MAG (18:2) isomer1	Lipids	单酰甘油酯 (酰基 18:2) 异构1	脂质	13200	9
pmb0197	Positive	298.1	297.1	[M+H]+	-	N2-methylguanosine	Nucleotide and derivates	甲基鸟苷	核苷酸及衍生物	9	160000
pmb0287	Positive	351.4	350.4	[M+H]+	-	MAG (18:4) isomer2	Lipids	单酰甘油酯 (酰基 18:4) 异构2	脂质	9	65600
pmb0296	Positive	357.2	356.2	[M+H]+	-	MAG (18:1) isomer2	Lipids	单酰甘油酯 (酰基 18:2) 异构2	脂质	343000	146000
pmb0382	Positive	339.1	338.1	[M+H]+	-	O-Feruloyl 4-hydroxylcoumarin	Phenylpropanoids	阿魏酸 4-羟基香豆素	苯丙素	9	153000
pmb0449	Positive	162.1	161.1	[M+H]+	C00956	2-Aminoadipic acid (L-Homoglutamic acid)	Amino acid and derivatives	2-氨基己二酸 (L-高谷氨酸)	氨基酸及衍生物	2780000	2140000
pmb0464	Positive	458.1	457.1	[M+H]+	-	Aspartic acid di-O-glucoside	Amino acid and derivatives	天门冬氨酸 二葡糖苷	氨基酸及衍生物	2980000	254000
pmb0478	Positive	455.1	454.1	[M+H]+	-	Coumarin O-rutinoside	Phenylpropanoids	对香豆酸 O-鼠李糖基-O-己糖苷	苯丙素	9	272000
pmb0488	Positive	146.2	145.2	[M+H]+	C00315	Spermidine	Phenolamides	亚精胺	酚胺	9	43500
pmb0514	Positive	348.1	347.1	[M+H]+	C01367	Adenosine 3'-monophosphate	Nucleotide and derivates	腺苷 3'-单磷酸	核苷酸及衍生物	4460000	1640000
pmb0530	Positive	664.2	663.2	[M+H]+	C00003	Nicotinic acid adenine dinucleotide	Nucleotide and derivates	烟酰胺腺嘌呤二核苷	核苷酸及衍生物	86200	319000
pmb0532	Positive	349.1	348.1	[M+H]+	C00130	Inosine 5'-monophosphate	Nucleotide and derivates	5'-肌苷酸	核苷酸及衍生物	585000	299000
pmb0767	Positive	302.4	301.4	[M+H]+	-	D-erythro-Dihydrosphingosine	Alcohols	二氢鞘氨醇	醇类	51300	113000
pmb0786	Positive	180	179	[M+H]+	C00329	Glucosamine	Carbohydrates	氨基葡萄糖	糖类	9	8130000
pmb0829	Positive	98.9	97.9	[M+H]+	C00009	Phosphoric acid	Organic acids and derivatives	磷酸	有机酸及衍生物	25600000	57700000
pmb0848	Positive	494.3	493.3	[M+H]+	-	LysoPC 16:1 (2n isomer)	Lipids	溶血磷脂酰胆碱 16:1(2n异构)	脂质	9	2170000
pmb0852	Positive	520.3	519.3	[M+H]+	-	LysoPC 18:2	Lipids	溶血磷脂酰胆碱 18:2	脂质	9	23500000
pmb0854	Positive	518.3	517.3	[M+H]+	-	LysoPC 18:3	Lipids	溶血磷脂酰胆碱 18:3	脂质	188000	149000
pmb0855	Positive	496.3	495.3	[M+H]+	-	LysoPC 16:0	Lipids	溶血磷脂酰胆碱 16:0	脂质	527000	258000
pmb0856	Positive	480.5	479.5	[M+H]+	-	LysoPE 18:1 (2n isomer)	Lipids	溶血磷脂酰乙醇胺 18:1(2n异构)	脂质	9	6680000
pmb0859	Positive	522.4	521.4	[M+H]+	-	LysoPC 18:1 (2n isomer)	Lipids	溶血磷脂酰胆碱 18:1(2n异构)	脂质	100000	70600000
pmb0863	Positive	492.3	491.3	[M+H]+	-	LysoPC 16:2 (2n isomer)	Lipids	溶血磷脂酰胆碱 16:2	脂质	9	196000
pmb0864	Positive	426.3	425.3	[M+H]+	-	LysoPE 14:0	Lipids	溶血磷脂酰乙醇胺 14:0	脂质	9	14600
pmb0865	Positive	518.2	517.2	[M+H]+	-	LysoPC 18:3 (2n isomer)	Lipids	溶血磷脂酰胆碱 18:3(2n异构)	脂质	489000	322000
pmb0866	Positive	468.1	467.1	[M+H]+	-	LysoPC 14:0	Lipids	溶血磷脂酰胆碱 14:0	脂质	9	46400
pmb0873	Positive	520	519	[M+H]+	-	LysoPC 18:2 (2n isomer)	Lipids	溶血磷脂酰胆碱 18:2(2n异构)	脂质	41700	83000000
pmb0874	Positive	478.6	477.6	[M+H]+	-	LysoPE 18:2 (2n isomer)	Lipids	溶血磷脂酰乙醇胺 18:2(2n异构)	脂质	112000	883000
pmb0876	Positive	454.2	453.2	[M+H]+	-	LysoPE 16:0	Lipids	溶血磷脂酰乙醇胺 16:0	脂质	148000	272000
pmb0882	Positive	522.1	521.1	[M+H]+	-	LysoPC 18:1	Lipids	溶血磷脂酰胆碱 18:1	脂质	9	3480000
pmb0883	Positive	482.1	481.1	[M+H]+	-	LysoPE 18:0	Lipids	溶血磷脂酰乙醇胺 18:0	脂质	41500	37000
pmb0889	Positive	279.3	278.3	[M+H]+	C08364	Punicic acid	Lipids	石榴酸	脂质	11800000	17200000
pmb0890	Positive	355.1	354.1	[M+H]+	-	MAG (18:2)	Lipids	单酰甘油酯 (18:2)	脂质	9190	245000
pmb0962	Positive	235.1	234.1	[M+H]+	-	Lysine butyrate	Amino acid and derivatives	赖氨酸丁酸	氨基酸及衍生物	593000	93100000
pmb0964	Positive	366.2	365.2	[M+H]+	-	iP7G	Nucleotide and derivates	异戊烯基-7-葡糖苷	核苷酸及衍生物	2220000	9
pmb0981	Positive	348.2	347.2	[M+H]+	C00020	Adenosine 5'-monophosphate	Nucleotide and derivates	腺苷 5'-单磷酸	核苷酸及衍生物	8610000	2290000
pmb0998	Positive	364.1	363.1	[M+H]+	C00144	Guanosine 5'-monophosphate	Nucleotide and derivates	鸟苷 5'-单磷酸	核苷酸及衍生物	1570000	9
pmb1452	Positive	275.1	274.1	[M+H]+	-	N-Lauryldiethanolamine	Others	十二烷基乙醇胺	其它	1800000	2390000
pmb1605	Positive	353.3	352.3	[M+H]+	-	MAG (18:3) isomer3	Lipids	单酰甘油酯 (酰基 18:3) 异构3	脂质	366000	2330000
pmb1626	Positive	534.4	533.4	[M+H]+	-	MGMG (18:2) isomer1	Lipids	单酰甘油酯单糖 (18:2) 异构1	脂质	6990	1070000
pmb1650	Positive	279.2	278.2	[M+H]+	-	"Octadeca-11E,13E,15Z-trienoic acid"	Lipids	"十八碳-9E,13E,15Z-三烯酸"	脂质	98300000	208000000
pmb1656	Positive	353.1	352.1	[M+H]+	-	MAG (18:3) isomer4	Lipids	单酰甘油酯 (酰基 18:3) 异构4	脂质	290000	9
pmb1912	Positive	474.2	473.2	[M+H]+	C00234	10-Formyl-THF	Organic acids and derivatives	甲酰四氢叶酸	有机酸及衍生物	3000000	9660000
pmb2221	Positive	318.3	317.3	[M+H]+	C12144	4-Hydroxysphinganine	Lipids	4-羟基鞘氨醇	脂质	1420000	68300000
pmb2251	Positive	694.1	693.1	[M+H]+	-	DGMG (18:1)	Lipids	单酰甘油酯二糖 (18:1)	脂质	7840	1090000
pmb2260	Positive	480.1	479.1	[M+H]+	-	LysoPC 15:1	Lipids	溶血磷脂酰胆碱 15:1	脂质	9	38300
pmb2319	Positive	482.3	481.3	[M+H]+	-	LysoPC 15:0	Lipids	溶血磷脂酰胆碱 15:0	脂质	9	81500
pmb2325	Positive	353.1	352.1	[M+H]+	-	MAG (18:3) isomer2	Lipids	单酰甘油酯 (酰基 18:3) 异构2	脂质	24000	107000
pmb2383	Positive	534.1	533.1	[M+H]+	-	MGMG (18:2) isomer2	Lipids	单酰甘油酯单糖 (18:2) 异构2	脂质	9	165000
pmb2388	Positive	524.1	523.1	[M+H]+	-	LysoPC 18:0 (2n isomer)	Lipids	溶血磷脂酰胆碱 18:0(2n异构)	脂质	9	928000
pmb2406	Positive	510.1	509.1	[M+H]+	-	LysoPC 17:0	Lipids	溶血磷脂酰胆碱 17:0	脂质	9	27700
pmb2444	Positive	353.2	352.2	[M+H]+	-	MAG (18:3) isomer1	Lipids	单酰甘油酯 (酰基 18:3) 异构1	脂质	32600	101000
pmb2467	Positive	279.2	278.2	[M+H]+	C06427	α-Linolenic acid	Lipids	α-亚麻酸	脂质	9	883000
pmb2507	Negative	213.1	214.1	[M-H]-	C00672	2-Deoxyribose 1-phosphate	Others	2-脱氧核糖 1-磷酸	其它	1510000	1710000
pmb2636	Negative	335.1	336.1	[M-H]-	-	"8,15-DiHETE"	Lipids	"8,15-二羟基二十碳四烯酸"	脂质	88700	64700
pmb2640	Negative	199	200	[M-H]-	C02679	Lauric acid (C12:0)	Lipids	月桂酸	脂质	10200	11700
pmb2643	Negative	225	226	[M-H]-	C08322	Myristoleic acid (C14:1)	Lipids	豆蔻酸	脂质	3260	9460
pmb2654	Negative	460.1	461.1	[M-H]-	-	Anthranilate O-hexosyl-O-hexoside	Organic acids and derivatives	邻氨基苯甲酸 二己糖苷	有机酸及衍生物	7130000	63500
pmb2657	Negative	289.1	290.1	[M-H]-	C03406	Argininosuccinate	Organic acids and derivatives	精氨琥珀酸盐	有机酸及衍生物	392000	84700
pmb2684	Negative	328.1	329.1	[M-H]-	C00575	Cyclic AMP	Nucleotide and derivates	腺苷-3'-5'-环单磷酸	核苷酸及衍生物	1470000	837000
pmb2685	Negative	213.1	214.1	[M-H]-	C00673	2-Deoxyribose 5'-phosphate	Others	2-脱氧核糖 5'-磷酸	其它	821000	246000
pmb2778	Negative	295	296	[M-H]-	-	"9,10-EODE"	Lipids	"9,10-环氧十八碳二烯酸"	脂质	44700000	13000000
pmb2786	Negative	293	294	[M-H]-	-	9-HOTrE	Lipids	9-羟基十八碳三烯酸	脂质	249000	1430000
pmb2787	Negative	293.2	294.2	[M-H]-	-	9-KODE	Lipids	13-酮十八碳二烯酸	脂质	291000	93000
pmb2789	Negative	309	310	[M-H]-	-	13-HpOTrE(r)	Lipids	13-过氧十八碳三烯酸	脂质	9880000	2380000
pmb2791	Negative	309.1	310.1	[M-H]-	-	9-HpOTrE	Lipids	9-羟基过氧十八碳三烯酸	脂质	6050000	1710000
pmb2792	Negative	293	294	[M-H]-	-	13-HOTrE(r)	Lipids	13-羟基十八碳三烯酸2	脂质	29900000	132000
pmb2799	Negative	295	296	[M-H]-	-	"12,13-EODE"	Lipids	"12,13-环氧十八碳二烯酸"	脂质	185000	664000
pmb2804	Negative	311.1	312.1	[M-H]-	C04717	13-HPODE	Lipids	13-过氧十八碳二烯酸	脂质	7390000	7030000
pmb2855	Negative	307	308	[M-H]-	-	L-Glutamine O-hexside	Amino acid and derivatives	L-谷氨酰胺 O-己糖苷	氨基酸及衍生物	511000	902000
pmb2857	Negative	308.1	309.1	[M-H]-	-	L-Glutamic acid O-glucoside	Amino acid and derivatives	L-谷氨酸 O-己糖苷	氨基酸及衍生物	672000	607000
pmb2858	Negative	665.1	666.1	[M-H]-	C02052	Maltotetraose	Carbohydrates	麦芽四糖	糖类	307000	41900
pmb2867	Negative	350.1	351.1	[M-H]-	-	Kynurenic acid O-hexside	Organic acids and derivatives	犬尿酸 O-己糖苷	有机酸及衍生物	53600	65500
pmb2873	Negative	214.1	215.1	[M-H]-	-	3-(2-Naphthyl)-D-alanine	Amino acid and derivatives	3-(2-萘基)-D-丙氨酸	氨基酸及衍生物	471000	677000
pmb2922	Negative	565.1	566.1	[M-H]-	C00029	Uridine 5'-diphospho-D-glucose	Nucleotide and derivates	尿苷 5'-二磷酸葡萄糖	核苷酸及衍生物	77700	4960000
pmb2928	Negative	331	332	[M-H]-	-	Gallic acid O-Hexoside	Organic acids and derivatives	没食子酸 O-己糖苷	有机酸及衍生物	9	74400
pmb2952	Negative	251.1	252.1	[M-H]-	C05512	2'-Deoxyinosine	Nucleotide and derivates	2-脱氧肌苷	核苷酸及衍生物	1700000	611000
pmb3079	Negative	300.1	301.1	[M-H]-	C04256	N-Acetylglucosamine 1-phosphate	Others	N-乙酰葡萄糖胺 1-磷酸	其它	263000	102000
pmb3088	Negative	421.1	422.1	[M-H]-	C00689	Trehalose 6-phosphate	Carbohydrates	海藻糖 6-磷酸	糖类	59500	9
pmb3099	Negative	153	154	[M-H]-	C06608	Diethyl phosphate	Organic acids and derivatives	磷酸二乙酯	有机酸及衍生物	1360000	31300000
pmb3101	Negative	175.1	176.1	[M-H]-	C02504	2-Isopropylmalate	Organic acids and derivatives	2-异丙基苹果酸	有机酸及衍生物	75600	695000
pmb3107	Negative	359.1	360.1	[M-H]-	-	Syringic acid O-glucoside	Organic acids and derivatives	丁香酰己糖苷	有机酸及衍生物	9	19600
pmb3116	Negative	474.2	475.2	[M-H]-	-	LysoPE 18:3	Lipids	溶血磷脂酰乙醇胺 18:3	脂质	9	12100
pmb3121	Negative	478.1	479.1	[M-H]-	-	LysoPE 18:1	Lipids	溶血磷脂酰乙醇胺 18:1	脂质	9	716000
pmc0066	Positive	333.1	332.05	[M+H]+	C06196	2'-Deoxyinosine-5'-monophosphate	Nucleotide and derivates	2'-脱氧肌苷-5'-磷酸	核苷酸及衍生物	75600	14300
pmc0274	Positive	167.1	166.1	[M+H]+	C16614	6-Methylmercaptopurine	Nucleotide and derivates	6-甲基巯嘌呤	核苷酸及衍生物	144000000	159000000
pmc0281	Positive	400.2	399.2	[M+H]+	-	Adenosine O-ribose	Nucleotide and derivates	核糖腺苷酸	核苷酸及衍生物	440000	10000000
pmc0304	Positive	384.1	383.12	[M+H]+	-	Succinyladenosine	Nucleotide and derivates	琥珀酰腺苷	核苷酸及衍生物	82300000	18700000
pmc0960	Positive	544.4	543.4	[M+H]+	-	LysoPC 20:4	Lipids	溶血磷脂酰胆碱 20:4	脂质	9	9280000
pmd0017	Positive	203	202	[M+H]+	C00750	Spermine	Phenolamides	精胺	酚胺	141000000	194000000
pmd0130	Positive	468.3	467.3	[M+H]+	-	LysoPC 14:0 (2n isomer)	Lipids	溶血磷脂酰胆碱 14:0(2n异构)	脂质	9	45100
pmd0132	Positive	496.3	495.33	[M+H]+	-	LysoPC 16:0 (2n isomer)	Lipids	溶血磷脂酰胆碱 16:0(2n异构)	脂质	512000	349000
pmd0136	Positive	524.4	523.36	[M+H]+	-	LysoPC 18:0	Lipids	溶血磷脂酰胆碱 18:0	脂质	9	684000
pmd0144	Positive	550.4	549.37	[M+H]+	-	LysoPC 20:1 (2n isomer)	Lipids	溶血磷脂酰胆碱 20:1(2n异构)	脂质	9	60500
pmd0145	Positive	550.4	549.37	[M+H]+	-	LysoPC 20:1	Lipids	溶血磷脂酰胆碱 20:1	脂质	9	63100
pmd0160	Negative	452.3	453.3	[M-H]-	-	LysoPE 16:0 (2n isomer)	Lipids	溶血磷脂酰乙醇胺 16:0(2n异构)	脂质	29900	74600
pme0004	Positive	190.1	189.11	[M+H]+	C02427	L-Homocitrulline	Amino acid and derivatives	L-高瓜氨酸	氨基酸及衍生物	2200000	4620000
pme0005	Positive	121	120.04	[M+H]+	C15587	Purine	Nucleotide and derivates	嘌呤碱	核苷酸及衍生物	131000	9
pme0006	Positive	116.1	115.06	[M+H]+	C00148	L-Proline	Amino acid and derivatives	L-脯氨酸	氨基酸及衍生物	400000000	407000000
pme0008	Positive	176.1	175.1	[M+H]+	C00327	L-Citrulline	Amino acid and derivatives	L-瓜氨酸	氨基酸及衍生物	4560000	14200000
pme0010	Positive	106	105.04	[M+H]+	C00065	L-Serine	Amino acid and derivatives	L-丝氨酸	氨基酸及衍生物	3540000	6510000
pme0011	Negative	132	133.04	[M-H]-	C00049	L-Aspartic acid	Amino acid and derivatives	L-天冬氨酸	氨基酸及衍生物	10300000	16500000
pme0013	Negative	146.1	147.05	[M-H]-	C00025	L-Glutamic acid	Amino acid and derivatives	L-谷氨酸	氨基酸及衍生物	16300000	41400000
pme0016	Positive	241	240.02	[M+H]+	C00491	L-(-)-Cystine	Amino acid and derivatives	L-(-)-胱氨酸	氨基酸及衍生物	368000	410000
pme0018	Negative	130.1	131.09	[M-H]-	C00123	L-Leucine	Amino acid and derivatives	L-亮氨酸	氨基酸及衍生物	8410000	5460000
pme0021	Positive	166	165.08	[M+H]+	C00079	L-Phenylalanine	Amino acid and derivatives	L-苯丙氨酸	氨基酸及衍生物	501000000	555000000
pme0023	Positive	120	119.06	[M+H]+	C00188	L-Threonine	Amino acid and derivatives	L-(-)-苏氨酸	氨基酸及衍生物	16400000	9
pme0024	Negative	124	125.02	[M-H]-	C00245	2-Aminoethanesulfonic acid	Organic acids and derivatives	2-氨基乙烷磺酸	有机酸及衍生物	663000	7330000
pme0025	Positive	209.1	208.08	[M+H]+	C00328	L-Kynurenine	Amino acid and derivatives	L-犬尿氨酸	氨基酸及衍生物	3010000	5200000
pme0026	Positive	147	146.11	[M+H]+	C00047	L-(+)-Lysine	Amino acid and derivatives	L-(+)-赖氨酸	氨基酸及衍生物	123000000	248000000
pme0030	Positive	182.1	181.07	[M+H]+	C00082	L-(-)-Tyrosine	Amino acid and derivatives	L-(-)-酪氨酸	氨基酸及衍生物	341000000	522000000
pme0031	Positive	127	126.04	[M+H]+	C00178	Thymine	Nucleotide and derivates	胸腺嘧啶	核苷酸及衍生物	925000	6130000
pme0033	Positive	137	136.04	[M+H]+	C00262	Hypoxanthine	Nucleotide and derivates	次黄嘌呤	核苷酸及衍生物	3120000	20900000
pme0037	Positive	156.1	155.07	[M+H]+	C00135	L-Histidine	Amino acid and derivatives	L-组氨酸	氨基酸及衍生物	6260000	34800000
pme0038	Positive	112	111.04	[M+H]+	C00380	Cytosine	Nucleotide and derivates	胞嘧啶	核苷酸及衍生物	28800000	9590000
pme0039	Positive	118.1	117.08	[M+H]+	C00183	L-Valine	Amino acid and derivatives	L-缬氨酸	氨基酸及衍生物	438000000	435000000
pme0040	Positive	136.1	135.05	[M+H]+	C00147	Adenine	Nucleotide and derivates	腺嘌呤	核苷酸及衍生物	48400000	343000000
pme0043	Positive	175	174.11	[M+H]+	C00062	L-(+)-Arginine	Amino acid and derivatives	L-(+)-精氨酸	氨基酸及衍生物	119000000	154000000
pme0049	Positive	110	109.02	[M+H]+	C00519	2-Aminoethanesulfinic acid	Organic acids and derivatives	2-氨基乙烷亚磺酸	有机酸及衍生物	376000	360000
pme0056	Negative	145.1	146.06	[M-H]-	-	"2,3-dimethylsuccinic acid"	Amino acid and derivatives	"2,3-二甲基丁氨酸"	氨基酸及衍生物	1020000	431000
pme0057	Positive	136	135.04	[M+H]+	C00155	DL-Homocysteine	Amino acid and derivatives	L-高半胱氨酸	氨基酸及衍生物	3270000	2800000
pme0066	Negative	116.1	117.05	[M-H]-	C00581	Guanidineacetic acid	Amino acid and derivatives	乙酸胍	氨基酸及衍生物	388000	1030000
pme0075	Negative	188.1	189.06	[M-H]-	C00624	N-Acetyl-L-glutamic acid	Amino acid and derivatives	N-乙酰-L-谷氨酸	氨基酸及衍生物	1390000	4280000
pme0108	Positive	126.1	125.06	[M+H]+	C02376	5-Methylcytosine	Nucleotide and derivates	5-甲基胞嘧啶	核苷酸及衍生物	2780000	482000
pme0109	Positive	212.2	211.08	[M+H]+	C07194	"(-)-3-(3,4-Dihydroxyphenyl)-2-methylalanine"	Amino acid and derivatives	"(-)-3-(3,4-二羟基苯基)-2-甲基丙氨酸"	氨基酸及衍生物	811000	9
pme0113	Positive	251.3	250.06	[M+H]+	C00669	γ-Glu-Cys	Amino acid and derivatives	γ-L-谷氨酸-L-半胱氨酸	氨基酸及衍生物	518000	520000
pme0120	Positive	118.2	117.08	[M+H]+	C00431	5-Aminovaleric acid	Amino acid and derivatives	5-氨基戊酸	氨基酸及衍生物	820000	1570000
pme0122	Positive	189.2	188.12	[M+H]+	C02727	N6-Acetyl-L-lysine	Amino acid and derivatives	N6-乙酰-L-赖氨酸	氨基酸及衍生物	11900000	87100000
pme0124	Positive	173.2	172.08	[M+H]+	-	Glycyl-L-proline	Amino acid and derivatives	甘氨酰-L-脯氨酸	氨基酸及衍生物	1220000	1140000
pme0129	Positive	161.2	160.08	[M+H]+	C00993	D-Alanyl-D-Alanine	Amino acid and derivatives	D-丙氨酰-D-丙氨酸	氨基酸及衍生物	337000	665000
pme0133	Positive	281.3	280.11	[M+H]+	-	Asp-phe	Amino acid and derivatives	天冬氨酸-苯丙氨酸	氨基酸及衍生物	1680000	5220000
pme0138	Positive	189.2	188.08	[M+H]+	-	Nα-Acetyl-L-glutamine	Amino acid and derivatives	N-乙酰-L-谷氨酰胺	氨基酸及衍生物	10300000	71600000
pme0161	Negative	118.1	119.06	[M-H]-	C00263	L-Homoserine	Amino acid and derivatives	同型丝氨酸	氨基酸及衍生物	246000	219000
pme0166	Positive	167.1	166.05	[M+H]+	C16358	1-Methylxanthine	Nucleotide and derivates	1-甲基黄嘌呤	核苷酸及衍生物	9	258000
pme0170	Positive	217.1	216.12	[M+H]+	-	Nα-Acetyl-L-arginine	Amino acid and derivatives	Nα-乙酰-L-精氨酸	氨基酸及衍生物	7670000	18500000
pme0171	Negative	158.1	159.09	[M-H]-	-	N-Isovaleroylglycine	Amino acid and derivatives	N-异戊酰氨基乙酸	氨基酸及衍生物	32500	70100
pme0174	Positive	132.1	131.06	[M+H]+	-	N-Propionylglycine	Amino acid and derivatives	丙甘氨酸	氨基酸及衍生物	6060000	5310000
pme0181	Positive	170.1	169.09	[M+H]+	C01152	1-Methylhistidine	Amino acid and derivatives	1-甲基组氨酸	氨基酸及衍生物	1370000	3340000
pme0183	Positive	152.1	151.05	[M+H]+	-	2-Hydroxy-6-aminopurine	Nucleotide and derivates	2-羟基-6-氨基嘌呤	核苷酸及衍生物	18300000	3250000
pme0191	Positive	189.1	188.12	[M+H]+	C02155	N-Glycyl-L-leucine	Amino acid and derivatives	N-甘氨酰-L-亮氨酸	氨基酸及衍生物	14900000	144000000
pme0193	Positive	147.1	146.07	[M+H]+	C00064	L-Glutamine	Amino acid and derivatives	L-谷氨酰胺	氨基酸及衍生物	154000000	272000000
pme0195	Negative	120	121.02	[M-H]-	C00097	L-Cysteine	Amino acid and derivatives	L-半胱氨酸	氨基酸及衍生物	748000	380000
pme0207	Negative	103	104.05	[M-H]-	-	3-Hydroxybutyrate	Organic acids and derivatives	3-羟基丁酸	有机酸及衍生物	9	2870000
pme0225	Positive	133.1	132.05	[M+H]+	C00152	L-Asparagine	Amino acid and derivatives	L-天冬酰胺	氨基酸及衍生物	2930000	2590000
pme0230	Positive	268.1	267.1	[M+H]+	C00212	Adenosine	Nucleotide and derivates	腺苷	核苷酸及衍生物	720000000	681000000
pme0231	Positive	247.1	246.1	[M+H]+	-	N-(3-Indolylacetyl)-L-alanine	Amino acid and derivatives	N-(3-吲哚乙酰基)-L-丙氨酸	氨基酸及衍生物	95200	9
pme0234	Positive	190	189.04	[M+H]+	C01717	Kynurenic acid	Organic acids and derivatives	犬尿酸	有机酸及衍生物	5440000	2760000
pme0237	Positive	183.1	182.06	[M+H]+	-	"Ethyl 3,4-Dihydroxybenzoate (Ethyl protocatechuate)"	Organic acids and derivatives	"3,4-二羟基苯甲酸乙酯 (安息香酸)"	有机酸及衍生物	184000	509000
pme0240	Negative	121	122.04	[M-H]-	C00180	Benzoic acid	Organic acids and derivatives	苯甲酸	有机酸及衍生物	9230000	6310000
pme0243	Negative	131	132.04	[M-H]-	C00489	Glutaric acid	Organic acids and derivatives	戊二酸	有机酸及衍生物	5370000	3810000
pme0245	Negative	145.1	146.06	[M-H]-	C06104	Adipic acid	Organic acids and derivatives	己二酸	有机酸及衍生物	1110000	447000
pme0247	Negative	130.1	131.06	[M-H]-	C01157	trans-4-Hydroxy-L-proline	Amino acid and derivatives	反-4-羟基-L-脯氨酸	氨基酸及衍生物	36200	25900
pme0250	Negative	187.1	188.1	[M-H]-	C08261	Azelaic acid	Organic acids and derivatives	壬二酸	有机酸及衍生物	3910000	15200000
pme0253	Positive	174.1	173.11	[M+H]+	C02710	N-Acetyl-l-leucine	Amino acid and derivatives	N-乙酰-L-亮氨酸	氨基酸及衍生物	2320000	1110000
pme0256	Negative	151	152.03	[M-H]-	C00385	Xanthine	Nucleotide and derivates	黄嘌呤	核苷酸及衍生物	23900000	37900000
pme0258	Positive	113	112.03	[M+H]+	C00106	Uracil	Nucleotide and derivates	尿嘧啶	核苷酸及衍生物	6430000	5370000
pme0263	Positive	259.1	258.09	[M+H]+	-	5-Methyluridine	Nucleotide and derivates	5-甲基尿苷	核苷酸及衍生物	1910000	1590000
pme0264	Positive	243.1	242.09	[M+H]+	C00214	Thymidine	Nucleotide and derivates	胸苷	核苷酸及衍生物	7660000	3220000
pme0265	Positive	203.1	202.12	[M+H]+	C08277	Sebacate	Organic acids and derivatives	癸二酸	有机酸及衍生物	119000	272000
pme0267	Negative	131	132.04	[M-H]-	-	2-Methylsuccinic acid	Organic acids and derivatives	甲基丁二酸	有机酸及衍生物	4390000	14700000
pme0272	Negative	149	150.03	[M-H]-	C02137	Benzoylformic acid	Organic acids and derivatives	苯乙醛酸	有机酸及衍生物	9	301000
pme0274	Positive	132.1	131.09	[M+H]+	C02378	6-Aminocaproic acid	Organic acids and derivatives	6-氨基己酸	有机酸及衍生物	201000000	200000000
pme0275	Negative	115	116.05	[M-H]-	-	4-Oxopentanoate	Organic acids and derivatives	4-氧代戊酸	有机酸及衍生物	110000	179000
pme0279	Negative	189.1	190.1	[M-H]-	C00666	"2,6-Diaminooimelic acid"	Amino acid and derivatives	"2,6-二氨基庚二酸"	氨基酸及衍生物	83300	3140000
pme0281	Negative	165	166.03	[M-H]-	C06337	Terephthalic acid	Organic acids and derivatives	对苯二甲酸	有机酸及衍生物	8870000	5100000
pme0283	Positive	167	166.03	[M+H]+	C01606	Phthalic acid	Organic acids and derivatives	邻苯二甲酸	有机酸及衍生物	854000	537000
pme0285	Positive	146.1	145.09	[M+H]+	C01035	4-Guanidinobutyric acid	Organic acids and derivatives	4-胍基丁酸	有机酸及衍生物	69900000	126000000
pme0286	Negative	131.1	132.08	[M-H]-	-	2-Hydroxyisocaproic acid	Organic acids and derivatives	2-羟基-4-甲基戊酸	有机酸及衍生物	1240000	4810000
pme0291	Positive	160.1	159.13	[M+H]+	-	Dl-2-Aminooctanoic acid	Organic acids and derivatives	DL-2-氨基辛酸	有机酸及衍生物	9	3960000
pme0295	Positive	146.1	145.07	[M+H]+	-	4-Acetamidobutyric acid	Organic acids and derivatives	4-乙酰氨基丁酸	有机酸及衍生物	5120000	31200000
pme0300	Positive	149.1	148.05	[M+H]+	C00423	trans-Cinnamate	Phenylpropanoids	反式肉桂酸	苯丙素	1150000	246000
pme0309	Negative	183	184.04	[M-H]-	-	Methyl gallate	Organic acids and derivatives	没食子酸甲酯	有机酸及衍生物	20300	17100
pme0310	Negative	197.1	198.05	[M-H]-	-	Ethyl gallate	Organic acids and derivatives	没食子酸乙酯	有机酸及衍生物	9	730000
pme0388	Positive	183.1	182.06	[M+H]+	C05582	Homovanillic acid	Phenylpropanoids	高香草酸	苯丙素	455000	9
pme0391	Positive	177	176.05	[M+H]+	C03081	4-Methylumbelliferone	Phenylpropanoids	4-甲基伞形酮	苯丙素	868000	276000
pme0414	Positive	153	152.05	[M+H]+	C00755	Vanillin	Organic acids and derivatives	香兰素	有机酸及衍生物	438000	599000
pme0419	Positive	167.1	166.06	[M+H]+	C01744	3-(4-Hydroxyphenyl)propionic acid	Phenylpropanoids	对羟基苯丙酸	苯丙素	994000	8280000
pme0423	Positive	195.1	194.06	[M+H]+	-	3-Hydroxy-4-methoxycinnamic acid	Phenylpropanoids	异阿魏酸	苯丙素	9	33800
pme0429	Positive	239.1	238.08	[M+H]+	-	"3,4,5-Trimethoxycinnamic acid"	Phenylpropanoids	"3,4,5-三甲氧基肉桂酸"	苯丙素	128000	9
pme0486	Negative	117	118.03	[M-H]-	C02170	Methylmalonic acid	Organic acids and derivatives	甲基丙二酸	有机酸及衍生物	27400000	38100000
pme0499	Negative	181	182.08	[M-H]-	C00794	D-Sorbitol	Alcohols	D-山梨糖醇	醇类	34400000	25500000
pme0513	Negative	151	152.07	[M-H]-	C00379	Xylitol	Alcohols	木糖醇	醇类	2470000	1650000
pme0516	Negative	179.2	180.06	[M-H]-	C00137	Inositol	Alcohols	肌醇	醇类	882000	298000
pme0519	Negative	341	342.12	[M-H]-	-	D-(+)-Sucrose	Carbohydrates	D-(+)-蔗糖	糖类	2970000	329000
pme0524	Positive	505.2	504.17	[M+H]+	-	D(+)-Melezitose	Carbohydrates	D(+)-松三糖	糖类	9	21300
pme0534	Negative	195.2	196.06	[M-H]-	C00257	Gluconic acid	Others	葡萄糖酸	其它	52300000	7310000
pme1002	Positive	138.1	137.08	[M+H]+	C00483	L-Tyramine	Amino acid and derivatives	酪胺	氨基酸及衍生物	106000	1940000
pme1021	Negative	177.1	178.05	[M-H]-	C00198	"D-(+)-Glucono-1,5-lactone"	Carbohydrates	葡糖酸内酯	糖类	427000	240000
pme1063	Negative	243.1	244.07	[M-H]-	C00299	Uridine	Nucleotide and derivates	尿嘧啶核苷	核苷酸及衍生物	24400000	20500000
pme1086	Negative	306	307.08	[M-H]-	C00051	Glutathione reduced form	Amino acid and derivatives	谷胱甘肽还原型	氨基酸及衍生物	9	24600
pme1104	Negative	130.1	131.1	[M-H]-	C00407	L-Isoleucine	Amino acid and derivatives	L-异亮氨酸	氨基酸及衍生物	4750000	2990000
pme1109	Positive	152	151.05	[M+H]+	C00242	Guanine	Nucleotide and derivates	鸟嘌呤	核苷酸及衍生物	20100000	7600000
pme1119	Positive	269.1	268.08	[M+H]+	C00294	Inosine	Nucleotide and derivates	肌苷	核苷酸及衍生物	10200000	19000000
pme1162	Negative	169	170.02	[M-H]-	C01424	Gallic acid	Organic acids and derivatives	没食子酸	有机酸及衍生物	9	2300000
pme1178	Positive	284.1	283.09	[M+H]+	C00387	Guanosine	Nucleotide and derivates	鸟苷	核苷酸及衍生物	281000000	74800000
pme1184	Positive	268.1	267.1	[M+H]+	C00330	Deoxyguanosine	Nucleotide and derivates	2'-脱氧鸟苷	核苷酸及衍生物	91600000	21800000
pme1194	Positive	228	227.09	[M+H]+	C00881	Deoxycytidine	Nucleotide and derivates	脱氧胞苷	核苷酸及衍生物	57900000	26100000
pme1228	Positive	221.1	220.09	[M+H]+	C00643	5-Hydroxy-L-tryptophan	Amino acid and derivatives	5-羟基色氨酸	氨基酸及衍生物	92900	9
pme1242	Positive	322.4	321.1	[M+H]+	C11347	S-(methyl)glutathione	Amino acid and derivatives	S-甲基谷胱甘肽	氨基酸及衍生物	9	1790000
pme1266	Positive	167.1	166.05	[M+H]+	C16357	3-Methylxanthine	Nucleotide and derivates	3-甲基黄嘌呤	核苷酸及衍生物	384000	9
pme1286	Positive	385	384.12	[M+H]+	C00021	S-(5'-Adenosy)-L-homocysteine	Amino acid and derivatives	S-(5-腺苷)-L-高半胱氨酸	氨基酸及衍生物	9	90100
pme1296	Positive	285.1	284.08	[M+H]+	C01762	Xanthosine	Nucleotide and derivates	黄苷	核苷酸及衍生物	96200000	36100000
pme1313	Positive	237.1	236.08	[M+H]+	C02700	N'-Formylkynurenine	Amino acid and derivatives	N’-甲酰基犬尿氨酸	氨基酸及衍生物	334000	7800000
pme1346	Positive	300.1	299.09	[M+H]+	-	8-Hydroxyguanosine	Nucleotide and derivates	8-羟基鸟苷	核苷酸及衍生物	3110000	1050000
pme1368	Negative	128	129.08	[M-H]-	C00408	L-Pipecolic acid	Amino acid and derivatives	L-哌啶酸	氨基酸及衍生物	1120000	1880000
pme1376	Positive	308	307.06	[M+H]+	C00239	2'-Deoxycytidine-5'-monophosphate	Nucleotide and derivates	2'-脱氧胞苷-5'-单磷酸	核苷酸及衍生物	832000	104000
pme1378	Positive	282.1	281.11	[M+H]+	C02494	1-Methyladenosine	Nucleotide and derivates	1-甲基腺苷	核苷酸及衍生物	5300000	1470000
pme1436	Negative	163	164.05	[M-H]-	C00811	p-Coumaric acid	Phenylpropanoids	4-香豆酸	苯丙素	790000	9
pme1474	Positive	298	297.09	[M+H]+	C00170	5'-Deoxy-5'-(methylthio)adenosine	Nucleotide and derivates	5-脱氧-5-甲硫腺苷	核苷酸及衍生物	9	89100
pme1683	Positive	477.2	476.17	[M+H]+	C12276	D-Pantothenic dcid	Organic acids and derivatives	D-泛酸	有机酸及衍生物	405000	4940000
pme1711	Negative	117.1	118.06	[M-H]-	-	3-Hydroxy-3-methyl butyric acid	Organic acids and derivatives	β-羟基异戊酸	有机酸及衍生物	2020000	942000
pme1712	Negative	275	276.13	[M-H]-	C00449	L-Saccharopine	Amino acid and derivatives	L-酵母氨酸	氨基酸及衍生物	4920000	4580000
pme1724	Positive	137.1	136.05	[M+H]+	C20645	Methyl benzoate	Organic acids and derivatives	苯甲酸甲酯	有机酸及衍生物	108000	356000
pme1730	Negative	117	118.03	[M-H]-	-	D-Erythronolactone	Organic acids and derivatives	赤酮酸内酯	有机酸及衍生物	160000	73600
pme1820	Negative	151	152.05	[M-H]-	C00642	p–Hydroxyphenyl acetic acid	Organic acids and derivatives	对-羟基苯乙酸	有机酸及衍生物	739000	138000
pme1830	Negative	117	118.03	[M-H]-	C00042	Succinic acid	Organic acids and derivatives	琥珀酸	有机酸及衍生物	88800000	88400000
pme1841	Positive	103	102.12	[M+H]+	C01672	"1,5-Diaminopentane"	Phenolamides	尸胺	酚胺	453000	682000
pme1846	Negative	179	180.06	[M-H]-	C00031	D(+)-Glucose	Carbohydrates	D(+)-无水葡萄糖	糖类	2910000	378000
pme1944	Positive	183.1	182.08	[M+H]+	C00392	D-Mannitol	Alcohols	D-甘露醇	醇类	7600000	8670000
pme1980	Positive	175.1	174.09	[M+H]+	C08278	Suberic acid	Organic acids and derivatives	辛二酸	有机酸及衍生物	340000	497000
pme1987	Negative	88	89.05	[M-H]-	C00041	L-Alanine	Amino acid and derivatives	L-丙氨酸	氨基酸及衍生物	18600	9
pme2019	Negative	149	150.05	[M-H]-	-	DL-Arabinose	Carbohydrates	DL-阿拉伯糖	糖类	1990000	409000
pme2033	Negative	133	134.02	[M-H]-	C00497	L(-)-Malic acid	Organic acids and derivatives	L-苹果酸	有机酸及衍生物	89500000	58700000
pme2046	Positive	170	169.18	[M+H]+	-	3-N-Methyl-L-histidine	Amino acid and derivatives	3-N-甲基-L-组氨酸	氨基酸及衍生物	9	124000
pme2049	Negative	103	104.05	[M-H]-	C05984	2-Hydroxybutanoic acid	Organic acids and derivatives	2-羟基丁酸	有机酸及衍生物	2580000	2380000
pme2050	Negative	191	192.03	[M-H]-	C00158	Citric acid	Organic acids and derivatives	柠檬酸	有机酸及衍生物	41700000	13700000
pme2054	Positive	205.1	204.09	[M+H]+	C00078	L-Tryptophan	Amino acid and derivatives	L-色氨酸	氨基酸及衍生物	65800000	8430000
pme2122	Positive	112.1	111.08	[M+H]+	C00388	Histamine	Amino acid and derivatives	组胺	氨基酸及衍生物	25500000	9500000
pme2129	Negative	131.1	132.08	[M-H]-	-	(S)-(-)-2-Hydroxyisocaproic acid	Organic acids and derivatives	羟基异己酸乙酯	有机酸及衍生物	9290000	36400000
pme2142	Negative	173.1	174.1	[M-H]-	C01047	L-Theanine	Amino acid and derivatives	L-茶氨酸	氨基酸及衍生物	9	108000
pme2169	Negative	115	116.01	[M-H]-	C00122	Fumaric acid	Organic acids and derivatives	延胡索酸	有机酸及衍生物	750000	6600000
pme2237	Negative	181.1	182.08	[M-H]-	C01697	Dulcitol	Alcohols	己六醇	醇类	44800000	30600000
pme2241	Negative	129	130.03	[M-H]-	C02226	Citraconic acid	Organic acids and derivatives	甲基马来酸	有机酸及衍生物	4620000	7520000
pme2255	Positive	179	178.05	[M+H]+	C01040	L-Gulonic-γ-lactone	Others	古洛糖酸内酯	其它	548000	126000
pme2256	Negative	151.1	152.07	[M-H]-	C01904	D-Arabitol	Alcohols	阿拉伯糖醇	醇类	2620000	1690000
pme2277	Negative	152	153.04	[M-H]-	-	3-Aminosalicylic acid	Organic acids and derivatives	3-氨基水杨酸	有机酸及衍生物	278000	621000
pme2278	Negative	362	363.06	[M-H]-	-	Guanosine monophosphate	Nucleotide and derivates	鸟苷单磷酸	核苷酸及衍生物	410000	71700
pme2292	Positive	89	88.1	[M+H]+	C00134	Putrescine	Phenolamides	腐胺	酚胺	9	7090000
pme2344	Positive	231.2	230.15	[M+H]+	-	Dodecanedioic aicd	Organic acids and derivatives	十二烷二酸	有机酸及衍生物	140000	254000
pme2380	Negative	145	146.02	[M-H]-	-	A-Ketoglutaric acid	Organic acids and derivatives	α-酮戊二酸	有机酸及衍生物	106000	265000
pme2430	Positive	224.1	223.09	[M+H]+	-	N-Acetyl-L-tyrosine	Amino acid and derivatives	N-乙酰-L-酪氨酸	氨基酸及衍生物	6120000	1690000
pme2435	Negative	163	164.07	[M-H]-	C01019	L-Fucose	Carbohydrates	L-岩藻糖	糖类	906000	645000
pme2527	Positive	133	132.16	[M+H]+	C00077	L(+)-Ornithine	Amino acid and derivatives	L-鸟氨酸	氨基酸及衍生物	690000	12000000
pme2529	Negative	163.2	164.07	[M-H]-	C07326	"1,5-Anhydro-D-glucitol"	Alcohols	"1,5-酐-D-山梨糖醇"	醇类	1010000	820000
pme2541	Negative	103	104.05	[M-H]-	-	α-Hydroxyisobutyric acid	Organic acids and derivatives	α-羟基异丁酸	有机酸及衍生物	622000	436000
pme2550	Negative	173	174.02	[M-H]-	C00417	Cis-Aconitic acid	Organic acids and derivatives	顺式乌头酸	有机酸及衍生物	9	49600
pme2559	Negative	174	175.05	[M-H]-	C01042	N-Acetylaspartate	Amino acid and derivatives	N-乙酰天冬氨酸	氨基酸及衍生物	627000	5900000
pme2566	Negative	217	218.09	[M-H]-	C03740	(5-L-Glutamyl)-L-amino acid	Amino acid and derivatives	5-L-谷氨酰-L-丙氨酸	氨基酸及衍生物	386000	964000
pme2598	Negative	167.1	168.04	[M-H]-	-	"3,4-Dihydroxybenzeneacetic acid"	Organic acids and derivatives	"3,4-二羟基苯乙酸"	有机酸及衍生物	251000	9
pme2601	Negative	89	90.03	[M-H]-	C01013	3-Hydroxypropanoic acid	Organic acids and derivatives	3-羟基丙酸	有机酸及衍生物	383000	572000
pme2603	Negative	152	153.04	[M-H]-	C00632	3-Hydroxyanthranilic acid	Organic acids and derivatives	3-羟基-2-氨基苯甲酸	有机酸及衍生物	9	4950000
pme2617	Positive	166	165.05	[M+H]+	-	Methionine sulfoxide	Amino acid and derivatives	蛋氨酸亚砜	氨基酸及衍生物	4630000	9
pme2634	Positive	118	117.08	[M+H]+	C01826	Dl-Norvaline	Amino acid and derivatives	缬氨酸	氨基酸及衍生物	408000000	417000000
pme2670	Negative	121	122.04	[M-H]-	C00633	4-Hydroxybenzaldehyde	Organic acids and derivatives	4-羟基苯甲醛	有机酸及衍生物	11500000	71000000
pme2698	Positive	313.4	312.15	[M+H]+	-	Phe-Phe	Amino acid and derivatives	L-苯丙氨酸-L-苯丙氨酸	氨基酸及衍生物	9	58300000
pme2706	Negative	153.2	154.03	[M-H]-	C00196	"2,3-Dihydroxybenzoic acid"	Organic acids and derivatives	"2,3-二羟基苯甲酸"	有机酸及衍生物	9	21900000
pme2709	Negative	117.1	118.06	[M-H]-	-	2-Hydroxy-2-methyl butyric acid	Organic acids and derivatives	2-羟基-2-甲基丁酸	有机酸及衍生物	9	29400
pme2735	Positive	399.2	398.14	[M+H]+	C00019	S-(5'-Adenosyl)-L-methionine	Amino acid and derivatives	S-腺苷蛋氨酸	氨基酸及衍生物	167000	135000
pme2755	Positive	222	221.09	[M+H]+	C00140	N-Acetyl-D-glucosamine	Carbohydrates	N-乙酰氨基葡萄糖	糖类	26000000	36900000
pme2758	Negative	162	163.13	[M-H]-	C03079	4-Hydroxy-L-glutamic acid	Amino acid and derivatives	4-羟基-L-谷氨酸	氨基酸及衍生物	66900	673000
pme2761	Negative	161	162.02	[M-H]-	C01127	4-Hydroxy-2-oxoglutaric acid	Organic acids and derivatives	4-羟基-2-酮戊二酸	有机酸及衍生物	9	1210000
pme2765	Positive	181.1	180.07	[M+H]+	C13747	"1,7-Dimethylxanthine"	Nucleotide and derivates	"1,7-二甲基黄嘌呤"	核苷酸及衍生物	92100	9
pme2773	Positive	223	222.07	[M+H]+	C02291	L-Cystathionine	Amino acid and derivatives	L-胱硫醚	氨基酸及衍生物	9	268000
pme2798	Negative	165	166.05	[M-H]-	C16353	7-Methylxanthine	Nucleotide and derivates	7-甲基黄嘌呤	核苷酸及衍生物	9	733000
pme2827	Negative	239	240.25	[M-H]-	C00517	Palmitaldehyde	Lipids	棕榈醛	脂质	12100000	11800000
pme2853	Negative	172.1	173.11	[M-H]-	-	Hexanoyl glycine	Amino acid and derivatives	己酰甘氨酸	氨基酸及衍生物	34700	9
pme2867	Positive	158.1	157.07	[M+H]+	C20828	3-Methylcrotonyl glycine	Amino acid and derivatives	N-(3-甲基-1-氧代-2-丁烯酸)氨基乙酸	氨基酸及衍生物	9	97000
pme2879	Negative	141	142.04	[M-H]-	C03088	5-Hydroxymethyluracil	Nucleotide and derivates	5-羟甲基尿嘧啶	核苷酸及衍生物	9	100000
pme2890	Positive	269	268.06	[M+H]+	C01817	L-Homocystine	Amino acid and derivatives	L-高胱氨酸	氨基酸及衍生物	118000	5600000
pme2903	Negative	137	138.03	[M-H]-	C00156	4-Hydroxybenzoic acid	Organic acids and derivatives	对羟基苯甲酸	有机酸及衍生物	17500000	22300000
pme2914	Negative	161	162.05	[M-H]-	C03761	"3-Hydroxy-3-methylpentane-1,5-dioic acid"	Amino acid and derivatives	3-羟基-3-甲基谷氨酸	氨基酸及衍生物	8040000	26000000
pme2996	Negative	161	162.03	[M-H]-	C20414	4-Hydroxycoumarin	Phenylpropanoids	4-羟基香豆素	苯丙素	520000	566000
pme3005	Positive	74.1	73.05	[M+H]+	C03134	"N,N-Dimethylformamide"	Organic acids and derivatives	"N,N-二甲基甲酰胺"	有机酸及衍生物	271000000	584000
pme3007	Negative	403	404.16	[M-H]-	C00015	Uridine 5’-diphosphate	Nucleotide and derivates	尿苷5'-二磷酸	核苷酸及衍生物	33500	60200
pme3009	Positive	175	174.02	[M+H]+	-	trans-Citridic acid	Organic acids and derivatives	反式乌头酸	有机酸及衍生物	2330000	364000
pme3011	Positive	104.1	103.06	[M+H]+	C00334	γ-aminobutyric acid	Organic acids and derivatives	γ-氨基丁酸	有机酸及衍生物	16800000	21200000
pme3017	Positive	104	103.06	[M+H]+	C03665	2-Aminoisobutyric acid	Amino acid and derivatives	2-氨基异丁酸	氨基酸及衍生物	42600000	85600000
pme3033	Positive	104	103.06	[M+H]+	C01026	"N,N-Dimethylglycine"	Amino acid and derivatives	"N,N-二甲基甘氨酸"	氨基酸及衍生物	10100000	13600000
pme3034	Negative	131	132.04	[M-H]-	-	ethylmalonate	Organic acids and derivatives	乙基丙二酸	有机酸及衍生物	193000	160000
pme3038	Positive	130	129.04	[M+H]+	C01879	5-oxoproline	Amino acid and derivatives	5-氧化脯氨酸	氨基酸及衍生物	195000000	184000000
pme3085	Positive	166	165.04	[M+H]+	-	2-(Formylamino)benzoic acid	Organic acids and derivatives	2-(甲酰氨基)苯甲酸	有机酸及衍生物	11600000	4530000
pme3096	Negative	118	119.02	[M-H]-	C00872	Aminomalonic acid	Organic acids and derivatives	氨基丙二酸	有机酸及衍生物	13400000	17300000
pme3104	Positive	150	149.07	[M+H]+	C02216	1-Methyladenine	Nucleotide and derivates	1-甲基腺嘌呤	核苷酸及衍生物	201000	1210000
pme3146	Negative	145.1	146.07	[M-H]-	-	Ureidoisobutyric acid	Organic acids and derivatives	B-脲基异丁酸	有机酸及衍生物	563000	2050000
pme3154	Negative	147.1	148.07	[M-H]-	-	(Rs)-Mevalonic acid	Organic acids and derivatives	"3,5-二羟基-3-甲基戊酸"	有机酸及衍生物	3130000	2590000
pme3160	Negative	259	260.03	[M-H]-	C00092	D-Glucose 6-phosphate	Carbohydrates	D-葡萄糖-6-磷酸	糖类	3730000	373000
pme3174	Positive	324	323.05	[M+H]+	C00055	Cytidine 5'-monophosphate (Cytidylic acid)	Nucleotide and derivates	胞苷-5-单磷酸	核苷酸及衍生物	9	1590000
pme3179	Positive	179	178.04	[M+H]+	C01419	CYS-GLY	Amino acid and derivatives	半胱氨酰甘氨酸	氨基酸及衍生物	52300	9
pme3184	Positive	332	331.07	[M+H]+	C00360	2'-Deoxyadenosine-5'-monophosphate	Nucleotide and derivates	5'-单磷酸-2'-脱氧腺苷	核苷酸及衍生物	6760000	642000
pme3188	Negative	323	324.04	[M-H]-	C00105	Uridine 5'-monophosphate	Nucleotide and derivates	5-尿嘧啶核苷酸(5-UMP)	核苷酸及衍生物	2860000	658000
pme3194	Positive	118	117.04	[M+H]+	-	N-acetylglycine	Amino acid and derivatives	N-乙酰基甘氨酸	氨基酸及衍生物	17100000	533000000
pme3200	Positive	74	73.1	[M+H]+	-	1-methylguanidine	Nucleotide and derivates	1-甲基胍	核苷酸及衍生物	347000	9
pme3309	Negative	145.1	146.06	[M-H]-	-	2-Methylglutaric acid	Organic acids and derivatives	2-甲基戊二酸	有机酸及衍生物	601000	3820000
pme3313	Negative	259	260.03	[M-H]-	C00085	D-Fructose 6-phosphate	Carbohydrates	D-果糖-6-磷酸	糖类	1650000	480000
pme3337	Positive	384	383.11	[M+H]+	-	N6-Succinyl Adenosine	Nucleotide and derivates	N6-琥珀酰腺苷	核苷酸及衍生物	65700000	16900000
pme3346	Negative	131.1	132.08	[M-H]-	-	5-hydroxyhexanoic acid	Organic acids and derivatives	5-羟基己酸	有机酸及衍生物	758000	418000
pme3350	Positive	284	283.09	[M+H]+	-	8-Hydroxy-2-deoxyguanosine	Nucleotide and derivates	8-羟基-2-脱氧鸟苷	核苷酸及衍生物	562000	88800
pme3367	Positive	161	160.05	[M+H]+	-	6-MethylCoumarin	Phenylpropanoids	6-甲基香豆素	苯丙素	9	181000
pme3384	Positive	162	161.07	[M+H]+	-	N-Acetylthreonine	Amino acid and derivatives	N-乙酰基苏氨酸	氨基酸及衍生物	460000	6240000
pme3388	Positive	189	188.13	[M+H]+	C01924	H-HomoArg-OH	Amino acid and derivatives	高精氨酸	氨基酸及衍生物	1110000	7690000
pme3413	Positive	147.1	146.04	[M+H]+	C05851	Coumarin	Phenylpropanoids	香豆素	苯丙素	218000	118000
pme3434	Negative	211.1	212.07	[M-H]-	-	"Eudesmic acid (3,4,5-trimethoxybenzoic acid)"	Organic acids and derivatives	"3,4,5-三甲氧基苯甲酸"	有机酸及衍生物	9	25500
pme3456	Positive	149.1	148.05	[M+H]+	-	p-Coumaraldehyde	Phenylpropanoids	香豆醛	苯丙素	9	345000
pme3576	Positive	138.1	137.05	[M+H]+	C00108	Anthranilic acid	Organic acids and derivatives	邻氨基苯甲酸	有机酸及衍生物	3010000	1920000
pme3705	Negative	193.1	194.04	[M-H]-	C00191	D-glucoronic acid	Others	葡萄糖醛酸	其它	809000	671000
pme3719	Negative	165.1	166.05	[M-H]-	-	D-Xylonic acid	Organic acids and derivatives	木糖酸	有机酸及衍生物	9180000	15700000
pme3732	Positive	244.1	243.09	[M+H]+	C00475	Cytidine	Nucleotide and derivates	胞苷	核苷酸及衍生物	87300000	45700000
pme3835	Negative	344.2	345.05	[M-H]-	C00942	"Guanosine 3',5'-cyclic monophosphate"	Nucleotide and derivates	"鸟苷 3',5'-环一磷酸"	核苷酸及衍生物	9	137000
pme3840	Negative	204.1	205.13	[M-H]-	C05944	Pantothenol	Alcohols	DL-泛酰醇	醇类	150000	300000
pme3882	Negative	227.1	228.08	[M-H]-	C00526	2'-Deoxyuridine	Nucleotide and derivates	2'-脱氧尿苷	核苷酸及衍生物	603000	246000
pme3961	Positive	252	251.1	[M+H]+	C00559	Deoxyadenosine	Nucleotide and derivates	2-脱氧腺苷	核苷酸及衍生物	310000000	81200000
pme3967	Positive	312	311.12	[M+H]+	-	2-(dimethylamino)guanosine	Nucleotide and derivates	二甲基鸟苷	核苷酸及衍生物	20500000	10300000
pme3968	Positive	166	165.07	[M+H]+	C02242	7-methylguanine	Nucleotide and derivates	7-甲基鸟嘌呤	核苷酸及衍生物	70600	9
pme3970	Negative	243	244.07	[M-H]-	C02067	β-Pseudouridine	Nucleotide and derivates	假尿苷	核苷酸及衍生物	2130000	1830000
pme3983	Positive	269.1	268.08	[M+H]+	-	Hypoxanthine-9-β-D-arabinofuranoside	Nucleotide and derivates	阿糖肌苷	核苷酸及衍生物	37200000	115000000
pmf0013	Positive	177.1	176.17	[M+H]+	C09268	7-Methoxycoumarin	Phenylpropanoids	7-甲氧基香豆素	苯丙素	612000	1920000
pmf0018	Positive	102.1	101.05	[M+H]+	-	1-Aminocyclopropanecarboxylic acid	Amino acid and derivatives	1-氨基环丙烷羧酸	氨基酸及衍生物	11800000	9
pmf0032	Negative	341.1	342.12	[M-H]-	-	Galactinol	Carbohydrates	肌醇半乳糖苷	糖类	4290000	413000
pmf0035	Negative	259	260.03	[M-H]-	-	Glucose-1-phosphate	Carbohydrates	葡萄糖-1-磷酸	糖类	3710000	314000
pmf0068	Positive	183.2	182.08	[M+H]+	C00392	Mannitol	Alcohols	甘露醇	醇类	2850000	3710000
pmf0096	Negative	88.9	90.03	[M-H]-	C00209	Oxalic acid	Organic acids and derivatives	草酸	有机酸及衍生物	3570000	1680000
pmf0118	Negative	565.1	610.02	[M-2Na+H]-	-	Uridine 5'-diphosphoglucose disodium salt	Nucleotide and derivates	尿甘 5’-二磷酸葡萄糖二钠盐	核苷酸及衍生物	43500	2620000
pmf0132	Positive	141	140.01	[M+H]+	-	Coumalic acid	Organic acids and derivatives	香豆酸	有机酸及衍生物	9	441000
pmf0136	Negative	565.1	566.06	[M-H]-	C00029	UDP-α-D-glucose	Nucleotide and derivates	尿苷二磷酸葡萄糖	核苷酸及衍生物	33200	2590000
pmf0138	Negative	179	180.063	[M-H]-	C00159	D-(+)-Mannose	Carbohydrates	甘露糖	糖类	9730000	1190000
pmf0139	Negative	179	180.06	[M-H]-	C00124	D-(+)-Galactose	Carbohydrates	D-(+)-半乳糖	糖类	5400000	9
pmf0174	Negative	157.2	158.28	[M-H]-	C01633	1-Decanol	Alcohols	1-癸醇	醇类	50900000	37900000
pmf0217	Negative	259	304.1	[M-2Na+H]-	-	D-Glucose-6-phosphate disodium salt	Others	6-磷酸葡萄糖二钠	其它	6340000	1140000
pmf0218	Negative	167	233.99	[M-3Na+2H]-	-	Phosphoenolpyruvate trisodium salt	Organic acids and derivatives	磷酸烯醇丙酮酸3钠盐	有机酸及衍生物	9	467000
pmf0220	Negative	259	303.99	[M-2Na+H]-	-	D-Fructose 6-phosphate-disodium salt	Carbohydrates	D-果糖-6-磷酸二钠盐	糖类	4280000	352000
pmf0272	Positive	343.1	378.14	[M+H]+	-	Galactinol Dihydrate	Carbohydrates	肌酸半乳糖苷二水	糖类	4550	9
pmf0281	Positive	217	194.04	[M+Na]+	C00333	D-Galacturonic acid	Organic acids and derivatives	D-半乳糖醛酸	有机酸及衍生物	1590000	18300000
pmf0282	Negative	341.1	342.12	[M-H]-	C05402	Melibiose	Carbohydrates	蜜二糖水合物	糖类	1120000	233000
pmf0283	Negative	121.1	122.06	[M-H]-	-	Meso-Erythritol	Alcohols	内消旋-赤藓醇	醇类	63200	1290000
pmf0289	Positive	336.2	335.16	[M+H]+	C16427	Riboprine	Nucleotide and derivates	利波腺苷	核苷酸及衍生物	730000	706000
pmf0292	Positive	302.3	301.3	[M+H]+	C00836	D-erythro-sphinganine	Amino acid and derivatives	刺氨酸	氨基酸及衍生物	68400	150000
pmf0294	Positive	271.3	270.29	[M+H]+	-	1-Octadecanol	Lipids	十八醇	脂质	1180000	1210000
pmf0297	Negative	297.3	298.32	[M-H]-	-	1-Eicosanol	Lipids	1-二十醇	脂质	2050000	2860000
pmf0320	Positive	197.1	196.07	[M+H]+	C10664	Acetosyringone	Phenylpropanoids	乙酰丁香酮	苯丙素	129000	9
pmf0353	Positive	287.3	286.29	[M+H]+	-	"1,18-Octadecanediol"	Lipids	"1,18-十八烷二醇"	脂质	9	30100
pmf0396	Positive	281.2	280.24	[M+H]+	C01595	Linoleic acid	Lipids	亚油酸(C18:2)	脂质	163000	161000
pmf0399	Negative	309.3	310.29	[M-H]-	C16526	cis-Gondoic acid	Lipids	二十碳烯酸(顺-11)(C20:1)	脂质	5870000	6960000
pmf0420	Negative	149	150.07	[M-H]-	C15513	Benzyl acetate	Organic acids and derivatives	乙酸苄酯	有机酸及衍生物	118000	110000
pmf0440	Positive	163.1	162.07	[M+H]+	C10475	4-Methoxycinna Maldehyde	Phenylpropanoids	4-甲氧基肉桂醛	苯丙素	593000	1020000
pmf0442	Positive	208.1	207.09	[M+H]+	C03519	N-Acetyl-L-phenylalanine	Amino acid and derivatives	N-乙酰基-L-苯丙氨酸	氨基酸及衍生物	5990000	1090000
pmf0448	Positive	162.1	161.05	[M+H]+	C16759	S-Allyl-L-cysteine	Amino acid and derivatives	S-烯丙基-L-半胱氨酸	氨基酸及衍生物	9	718000
pmf0470	Positive	132.1	131.06	[M+H]+	C03440	cis-4-Hydroxy-D-proline	Amino acid and derivatives	顺式-4-羟基-D-脯氨酸	氨基酸及衍生物	1120000	1600000
pmf0485	Negative	503.2	504.17	[M-H]-	C00713	Panose	Carbohydrates	D-潘糖	糖类	278000	9
pmf0585	Positive	116.1	115.06	[M+H]+	C16435	Proline	Amino acid and derivatives	DL-脯氨酸	氨基酸及衍生物	401000000	407000000
pmf0587	Negative	132	133.04	[M-H]-	C16433	Aspartic acid	Amino acid and derivatives	DL-天冬氨酸	氨基酸及衍生物	8810000	14800000
pmf0589	Negative	146	147.05	[M-H]-	-	Glutamic acid	Amino acid and derivatives	DL-谷氨酸	氨基酸及衍生物	16900000	45700000
pmf0591	Positive	149.2	148.16	[M+H]+	C10438	Cinnamic acid	Phenylpropanoids	肉桂酸	苯丙素	1000000	229000
pmf0593	Positive	118.2	117.15	[M+H]+	C06417	D-(-)-Valine	Amino acid and derivatives	D-缬氨酸	氨基酸及衍生物	214000000	213000000
pmf0594	Positive	166.2	165.19	[M+H]+	C02265	D-(+)-Phenylalanine	Amino acid and derivatives	D-苯丙氨酸	氨基酸及衍生物	367000000	409000000
pmf0596	Positive	252.2	251.24	[M+H]+	C08431	Cordycepin	Nucleotide and derivates	虫草素	核苷酸及衍生物	7800000	1690000

## Sheet: Sheet2
	Q1 (Da)	Molecular Weight (Da)	Ionization model	KEGG ID	Compounds	Class	物质	物质类别	1
pma0461	277.2	276.22	[M+H]+	-	"14,15-Dehydrocrepenynic acid"	Lipids	"14,15-脱氢还阳参油酸"	脂质	4720000
pma3606	295.2	294.2	[M+H]+	-	"9-Hydroxy-(10E,12Z,15Z)-octadecatrienoic acid"	Lipids	"9-羟基-(10E,12Z,15Z)十八碳三烯酸"	脂质	29500000
pmb0128	213.3	212.3	[M+H]+	-	delta-Tridecalactone	Lipids	十三烷内脂	脂质	74600
pmb0149	351	350	[M+H]+	-	MAG (18:4) isomer1	Lipids	单酰甘油酯 (酰基 18:4) 异构1	脂质	1400000
pmb0159	696.4	695.4	[M+H]+	-	DGMG (18:2) isomer2	Lipids	单酰甘油酯二糖 (18:2) 异构2	脂质	9
pmb0160	353.3	352.3	[M+H]+	-	MAG (18:3) isomer5	Lipids	单酰甘油酯 (酰基 18:3) 异构5	脂质	31300
pmb0161	696.4	695.4	[M+H]+	-	DGMG (18:2) isomer1	Lipids	单酰甘油酯二糖 (18:2) 异构1	脂质	7340
pmb0163	696.4	695.4	[M+H]+	-	DGMG (18:2) isomer3	Lipids	单酰甘油酯二糖 (18:2) 异构3	脂质	5200
pmb0164	355.1	354.1	[M+H]+	-	MAG (18:2) isomer1	Lipids	单酰甘油酯 (酰基 18:2) 异构1	脂质	13200
pmb0287	351.4	350.4	[M+H]+	-	MAG (18:4) isomer2	Lipids	单酰甘油酯 (酰基 18:4) 异构2	脂质	9
pmb0296	357.2	356.2	[M+H]+	-	MAG (18:1) isomer2	Lipids	单酰甘油酯 (酰基 18:2) 异构2	脂质	343000
pmb0848	494.3	493.3	[M+H]+	-	LysoPC 16:1 (2n isomer)	Lipids	溶血磷脂酰胆碱 16:1(2n异构)	脂质	9
pmb0852	520.3	519.3	[M+H]+	-	LysoPC 18:2	Lipids	溶血磷脂酰胆碱 18:2	脂质	9
pmb0854	518.3	517.3	[M+H]+	-	LysoPC 18:3	Lipids	溶血磷脂酰胆碱 18:3	脂质	188000
pmb0855	496.3	495.3	[M+H]+	-	LysoPC 16:0	Lipids	溶血磷脂酰胆碱 16:0	脂质	527000
pmb0856	480.5	479.5	[M+H]+	-	LysoPE 18:1 (2n isomer)	Lipids	溶血磷脂酰乙醇胺 18:1(2n异构)	脂质	9
pmb0859	522.4	521.4	[M+H]+	-	LysoPC 18:1 (2n isomer)	Lipids	溶血磷脂酰胆碱 18:1(2n异构)	脂质	100000
pmb0863	492.3	491.3	[M+H]+	-	LysoPC 16:2 (2n isomer)	Lipids	溶血磷脂酰胆碱 16:2	脂质	9
pmb0864	426.3	425.3	[M+H]+	-	LysoPE 14:0	Lipids	溶血磷脂酰乙醇胺 14:0	脂质	9
pmb0865	518.2	517.2	[M+H]+	-	LysoPC 18:3 (2n isomer)	Lipids	溶血磷脂酰胆碱 18:3(2n异构)	脂质	489000
pmb0866	468.1	467.1	[M+H]+	-	LysoPC 14:0	Lipids	溶血磷脂酰胆碱 14:0	脂质	9
pmb0873	520	519	[M+H]+	-	LysoPC 18:2 (2n isomer)	Lipids	溶血磷脂酰胆碱 18:2(2n异构)	脂质	41700
pmb0874	478.6	477.6	[M+H]+	-	LysoPE 18:2 (2n isomer)	Lipids	溶血磷脂酰乙醇胺 18:2(2n异构)	脂质	112000
pmb0876	454.2	453.2	[M+H]+	-	LysoPE 16:0	Lipids	溶血磷脂酰乙醇胺 16:0	脂质	148000
pmb0882	522.1	521.1	[M+H]+	-	LysoPC 18:1	Lipids	溶血磷脂酰胆碱 18:1	脂质	9
pmb0883	482.1	481.1	[M+H]+	-	LysoPE 18:0	Lipids	溶血磷脂酰乙醇胺 18:0	脂质	41500
pmb0889	279.3	278.3	[M+H]+	C08364	Punicic acid	Lipids	石榴酸	脂质	11800000
pmb0890	355.1	354.1	[M+H]+	-	MAG (18:2)	Lipids	单酰甘油酯 (18:2)	脂质	9190
pmb1605	353.3	352.3	[M+H]+	-	MAG (18:3) isomer3	Lipids	单酰甘油酯 (酰基 18:3) 异构3	脂质	366000
pmb1626	534.4	533.4	[M+H]+	-	MGMG (18:2) isomer1	Lipids	单酰甘油酯单糖 (18:2) 异构1	脂质	6990
pmb1650	279.2	278.2	[M+H]+	-	"Octadeca-11E,13E,15Z-trienoic acid"	Lipids	"十八碳-9E,13E,15Z-三烯酸"	脂质	98300000
pmb1656	353.1	352.1	[M+H]+	-	MAG (18:3) isomer4	Lipids	单酰甘油酯 (酰基 18:3) 异构4	脂质	290000
pmb2221	318.3	317.3	[M+H]+	C12144	4-Hydroxysphinganine	Lipids	4-羟基鞘氨醇	脂质	1420000
pmb2251	694.1	693.1	[M+H]+	-	DGMG (18:1)	Lipids	单酰甘油酯二糖 (18:1)	脂质	7840
pmb2260	480.1	479.1	[M+H]+	-	LysoPC 15:1	Lipids	溶血磷脂酰胆碱 15:1	脂质	9
pmb2319	482.3	481.3	[M+H]+	-	LysoPC 15:0	Lipids	溶血磷脂酰胆碱 15:0	脂质	9
pmb2325	353.1	352.1	[M+H]+	-	MAG (18:3) isomer2	Lipids	单酰甘油酯 (酰基 18:3) 异构2	脂质	24000
pmb2383	534.1	533.1	[M+H]+	-	MGMG (18:2) isomer2	Lipids	单酰甘油酯单糖 (18:2) 异构2	脂质	9
pmb2388	524.1	523.1	[M+H]+	-	LysoPC 18:0 (2n isomer)	Lipids	溶血磷脂酰胆碱 18:0(2n异构)	脂质	9
pmb2406	510.1	509.1	[M+H]+	-	LysoPC 17:0	Lipids	溶血磷脂酰胆碱 17:0	脂质	9
pmb2444	353.2	352.2	[M+H]+	-	MAG (18:3) isomer1	Lipids	单酰甘油酯 (酰基 18:3) 异构1	脂质	32600
pmb2467	279.2	278.2	[M+H]+	C06427	α-Linolenic acid	Lipids	α-亚麻酸	脂质	9
pmb2636	335.1	336.1	[M-H]-	-	"8,15-DiHETE"	Lipids	"8,15-二羟基二十碳四烯酸"	脂质	88700
pmb2640	199	200	[M-H]-	C02679	Lauric acid (C12:0)	Lipids	月桂酸	脂质	10200
pmb2643	225	226	[M-H]-	C08322	Myristoleic acid (C14:1)	Lipids	豆蔻酸	脂质	3260
pmb2778	295	296	[M-H]-	-	"9,10-EODE"	Lipids	"9,10-环氧十八碳二烯酸"	脂质	44700000
pmb2786	293	294	[M-H]-	-	9-HOTrE	Lipids	9-羟基十八碳三烯酸	脂质	249000
pmb2787	293.2	294.2	[M-H]-	-	9-KODE	Lipids	13-酮十八碳二烯酸	脂质	291000
pmb2789	309	310	[M-H]-	-	13-HpOTrE(r)	Lipids	13-过氧十八碳三烯酸	脂质	9880000
pmb2791	309.1	310.1	[M-H]-	-	9-HpOTrE	Lipids	9-羟基过氧十八碳三烯酸	脂质	6050000
pmb2792	293	294	[M-H]-	-	13-HOTrE(r)	Lipids	13-羟基十八碳三烯酸2	脂质	29900000
pmb2799	295	296	[M-H]-	-	"12,13-EODE"	Lipids	"12,13-环氧十八碳二烯酸"	脂质	185000
pmb2804	311.1	312.1	[M-H]-	C04717	13-HPODE	Lipids	13-过氧十八碳二烯酸	脂质	7390000
pmb3116	474.2	475.2	[M-H]-	-	LysoPE 18:3	Lipids	溶血磷脂酰乙醇胺 18:3	脂质	9
pmb3121	478.1	479.1	[M-H]-	-	LysoPE 18:1	Lipids	溶血磷脂酰乙醇胺 18:1	脂质	9
pmc0960	544.4	543.4	[M+H]+	-	LysoPC 20:4	Lipids	溶血磷脂酰胆碱 20:4	脂质	9
pmd0130	468.3	467.3	[M+H]+	-	LysoPC 14:0 (2n isomer)	Lipids	溶血磷脂酰胆碱 14:0(2n异构)	脂质	9
pmd0132	496.3	495.33	[M+H]+	-	LysoPC 16:0 (2n isomer)	Lipids	溶血磷脂酰胆碱 16:0(2n异构)	脂质	512000
pmd0136	524.4	523.36	[M+H]+	-	LysoPC 18:0	Lipids	溶血磷脂酰胆碱 18:0	脂质	9
pmd0144	550.4	549.37	[M+H]+	-	LysoPC 20:1 (2n isomer)	Lipids	溶血磷脂酰胆碱 20:1(2n异构)	脂质	9
pmd0145	550.4	549.37	[M+H]+	-	LysoPC 20:1	Lipids	溶血磷脂酰胆碱 20:1	脂质	9
pmd0160	452.3	453.3	[M-H]-	-	LysoPE 16:0 (2n isomer)	Lipids	溶血磷脂酰乙醇胺 16:0(2n异构)	脂质	29900
pme2827	239	240.25	[M-H]-	C00517	Palmitaldehyde	Lipids	棕榈醛	脂质	12100000
pmf0294	271.3	270.29	[M+H]+	-	1-Octadecanol	Lipids	十八醇	脂质	1180000
pmf0297	297.3	298.32	[M-H]-	-	1-Eicosanol	Lipids	1-二十醇	脂质	2050000
pmf0353	287.3	286.29	[M+H]+	-	"1,18-Octadecanediol"	Lipids	"1,18-十八烷二醇"	脂质	9
pmf0396	281.2	280.24	[M+H]+	C01595	Linoleic acid	Lipids	亚油酸(C18:2)	脂质	163000
pmf0399	309.3	310.29	[M-H]-	C16526	cis-Gondoic acid	Lipids	二十碳烯酸(顺-11)(C20:1)	脂质	5870000
pma2681	206.1	205.1	[M+H]+	C02470	Xanthurenic acid	Organic acids and derivatives	黄尿酸	有机酸及衍生物	112000
pma3649	132.1	131.1	[M+H]+	C00430	5-Aminolevulinate	Organic acids and derivatives	5-氨基酮戊酸盐	有机酸及衍生物	130000000
pmb0829	98.9	97.9	[M+H]+	C00009	Phosphoric acid	Organic acids and derivatives	磷酸	有机酸及衍生物	25600000
pmb1912	474.2	473.2	[M+H]+	C00234	10-Formyl-THF	Organic acids and derivatives	甲酰四氢叶酸	有机酸及衍生物	3000000
pmb2654	460.1	461.1	[M-H]-	-	Anthranilate O-hexosyl-O-hexoside	Organic acids and derivatives	邻氨基苯甲酸 二己糖苷	有机酸及衍生物	7130000
pmb2657	289.1	290.1	[M-H]-	C03406	Argininosuccinate	Organic acids and derivatives	精氨琥珀酸盐	有机酸及衍生物	392000
pmb2867	350.1	351.1	[M-H]-	-	Kynurenic acid O-hexside	Organic acids and derivatives	犬尿酸 O-己糖苷	有机酸及衍生物	53600
pmb2928	331	332	[M-H]-	-	Gallic acid O-Hexoside	Organic acids and derivatives	没食子酸 O-己糖苷	有机酸及衍生物	9
pmb3099	153	154	[M-H]-	C06608	Diethyl phosphate	Organic acids and derivatives	磷酸二乙酯	有机酸及衍生物	1360000
pmb3101	175.1	176.1	[M-H]-	C02504	2-Isopropylmalate	Organic acids and derivatives	2-异丙基苹果酸	有机酸及衍生物	75600
pmb3107	359.1	360.1	[M-H]-	-	Syringic acid O-glucoside	Organic acids and derivatives	丁香酰己糖苷	有机酸及衍生物	9
pme0024	124	125.02	[M-H]-	C00245	2-Aminoethanesulfonic acid	Organic acids and derivatives	2-氨基乙烷磺酸	有机酸及衍生物	663000
pme0049	110	109.02	[M+H]+	C00519	2-Aminoethanesulfinic acid	Organic acids and derivatives	2-氨基乙烷亚磺酸	有机酸及衍生物	376000
pme0207	103	104.05	[M-H]-	-	3-Hydroxybutyrate	Organic acids and derivatives	3-羟基丁酸	有机酸及衍生物	9
pme0234	190	189.04	[M+H]+	C01717	Kynurenic acid	Organic acids and derivatives	犬尿酸	有机酸及衍生物	5440000
pme0237	183.1	182.06	[M+H]+	-	"Ethyl 3,4-Dihydroxybenzoate (Ethyl protocatechuate)"	Organic acids and derivatives	"3,4-二羟基苯甲酸乙酯 (安息香酸)"	有机酸及衍生物	184000
pme0240	121	122.04	[M-H]-	C00180	Benzoic acid	Organic acids and derivatives	苯甲酸	有机酸及衍生物	9230000
pme0243	131	132.04	[M-H]-	C00489	Glutaric acid	Organic acids and derivatives	戊二酸	有机酸及衍生物	5370000
pme0245	145.1	146.06	[M-H]-	C06104	Adipic acid	Organic acids and derivatives	己二酸	有机酸及衍生物	1110000
pme0250	187.1	188.1	[M-H]-	C08261	Azelaic acid	Organic acids and derivatives	壬二酸	有机酸及衍生物	3910000
pme0265	203.1	202.12	[M+H]+	C08277	Sebacate	Organic acids and derivatives	癸二酸	有机酸及衍生物	119000
pme0267	131	132.04	[M-H]-	-	2-Methylsuccinic acid	Organic acids and derivatives	甲基丁二酸	有机酸及衍生物	4390000
pme0272	149	150.03	[M-H]-	C02137	Benzoylformic acid	Organic acids and derivatives	苯乙醛酸	有机酸及衍生物	9
pme0274	132.1	131.09	[M+H]+	C02378	6-Aminocaproic acid	Organic acids and derivatives	6-氨基己酸	有机酸及衍生物	201000000
pme0275	115	116.05	[M-H]-	-	4-Oxopentanoate	Organic acids and derivatives	4-氧代戊酸	有机酸及衍生物	110000
pme0281	165	166.03	[M-H]-	C06337	Terephthalic acid	Organic acids and derivatives	对苯二甲酸	有机酸及衍生物	8870000
pme0283	167	166.03	[M+H]+	C01606	Phthalic acid	Organic acids and derivatives	邻苯二甲酸	有机酸及衍生物	854000
pme0285	146.1	145.09	[M+H]+	C01035	4-Guanidinobutyric acid	Organic acids and derivatives	4-胍基丁酸	有机酸及衍生物	69900000
pme0286	131.1	132.08	[M-H]-	-	2-Hydroxyisocaproic acid	Organic acids and derivatives	2-羟基-4-甲基戊酸	有机酸及衍生物	1240000
pme0291	160.1	159.13	[M+H]+	-	Dl-2-Aminooctanoic acid	Organic acids and derivatives	DL-2-氨基辛酸	有机酸及衍生物	9
pme0295	146.1	145.07	[M+H]+	-	4-Acetamidobutyric acid	Organic acids and derivatives	4-乙酰氨基丁酸	有机酸及衍生物	5120000
pme0309	183	184.04	[M-H]-	-	Methyl gallate	Organic acids and derivatives	没食子酸甲酯	有机酸及衍生物	20300
pme0310	197.1	198.05	[M-H]-	-	Ethyl gallate	Organic acids and derivatives	没食子酸乙酯	有机酸及衍生物	9
pme0414	153	152.05	[M+H]+	C00755	Vanillin	Organic acids and derivatives	香兰素	有机酸及衍生物	438000
pme0486	117	118.03	[M-H]-	C02170	Methylmalonic acid	Organic acids and derivatives	甲基丙二酸	有机酸及衍生物	27400000
pme1162	169	170.02	[M-H]-	C01424	Gallic acid	Organic acids and derivatives	没食子酸	有机酸及衍生物	9
pme1683	477.2	476.17	[M+H]+	C12276	D-Pantothenic dcid	Organic acids and derivatives	D-泛酸	有机酸及衍生物	405000
pme1711	117.1	118.06	[M-H]-	-	3-Hydroxy-3-methyl butyric acid	Organic acids and derivatives	β-羟基异戊酸	有机酸及衍生物	2020000
pme1724	137.1	136.05	[M+H]+	C20645	Methyl benzoate	Organic acids and derivatives	苯甲酸甲酯	有机酸及衍生物	108000
pme1730	117	118.03	[M-H]-	-	D-Erythronolactone	Organic acids and derivatives	赤酮酸内酯	有机酸及衍生物	160000
pme1820	151	152.05	[M-H]-	C00642	p–Hydroxyphenyl acetic acid	Organic acids and derivatives	对-羟基苯乙酸	有机酸及衍生物	739000
pme1830	117	118.03	[M-H]-	C00042	Succinic acid	Organic acids and derivatives	琥珀酸	有机酸及衍生物	88800000
pme1980	175.1	174.09	[M+H]+	C08278	Suberic acid	Organic acids and derivatives	辛二酸	有机酸及衍生物	340000
pme2033	133	134.02	[M-H]-	C00497	L(-)-Malic acid	Organic acids and derivatives	L-苹果酸	有机酸及衍生物	89500000
pme2049	103	104.05	[M-H]-	C05984	2-Hydroxybutanoic acid	Organic acids and derivatives	2-羟基丁酸	有机酸及衍生物	2580000
pme2050	191	192.03	[M-H]-	C00158	Citric acid	Organic acids and derivatives	柠檬酸	有机酸及衍生物	41700000
pme2129	131.1	132.08	[M-H]-	-	(S)-(-)-2-Hydroxyisocaproic acid	Organic acids and derivatives	羟基异己酸乙酯	有机酸及衍生物	9290000
pme2169	115	116.01	[M-H]-	C00122	Fumaric acid	Organic acids and derivatives	延胡索酸	有机酸及衍生物	750000
pme2241	129	130.03	[M-H]-	C02226	Citraconic acid	Organic acids and derivatives	甲基马来酸	有机酸及衍生物	4620000
pme2277	152	153.04	[M-H]-	-	3-Aminosalicylic acid	Organic acids and derivatives	3-氨基水杨酸	有机酸及衍生物	278000
pme2344	231.2	230.15	[M+H]+	-	Dodecanedioic aicd	Organic acids and derivatives	十二烷二酸	有机酸及衍生物	140000
pme2380	145	146.02	[M-H]-	-	A-Ketoglutaric acid	Organic acids and derivatives	α-酮戊二酸	有机酸及衍生物	106000
pme2541	103	104.05	[M-H]-	-	α-Hydroxyisobutyric acid	Organic acids and derivatives	α-羟基异丁酸	有机酸及衍生物	622000
pme2550	173	174.02	[M-H]-	C00417	Cis-Aconitic acid	Organic acids and derivatives	顺式乌头酸	有机酸及衍生物	9
pme2598	167.1	168.04	[M-H]-	-	"3,4-Dihydroxybenzeneacetic acid"	Organic acids and derivatives	"3,4-二羟基苯乙酸"	有机酸及衍生物	251000
pme2601	89	90.03	[M-H]-	C01013	3-Hydroxypropanoic acid	Organic acids and derivatives	3-羟基丙酸	有机酸及衍生物	383000
pme2603	152	153.04	[M-H]-	C00632	3-Hydroxyanthranilic acid	Organic acids and derivatives	3-羟基-2-氨基苯甲酸	有机酸及衍生物	9
pme2670	121	122.04	[M-H]-	C00633	4-Hydroxybenzaldehyde	Organic acids and derivatives	4-羟基苯甲醛	有机酸及衍生物	11500000
pme2706	153.2	154.03	[M-H]-	C00196	"2,3-Dihydroxybenzoic acid"	Organic acids and derivatives	"2,3-二羟基苯甲酸"	有机酸及衍生物	9
pme2709	117.1	118.06	[M-H]-	-	2-Hydroxy-2-methyl butyric acid	Organic acids and derivatives	2-羟基-2-甲基丁酸	有机酸及衍生物	9
pme2761	161	162.02	[M-H]-	C01127	4-Hydroxy-2-oxoglutaric acid	Organic acids and derivatives	4-羟基-2-酮戊二酸	有机酸及衍生物	9
pme2903	137	138.03	[M-H]-	C00156	4-Hydroxybenzoic acid	Organic acids and derivatives	对羟基苯甲酸	有机酸及衍生物	17500000
pme3005	74.1	73.05	[M+H]+	C03134	"N,N-Dimethylformamide"	Organic acids and derivatives	"N,N-二甲基甲酰胺"	有机酸及衍生物	271000000
pme3009	175	174.02	[M+H]+	-	trans-Citridic acid	Organic acids and derivatives	反式乌头酸	有机酸及衍生物	2330000
pme3011	104.1	103.06	[M+H]+	C00334	γ-aminobutyric acid	Organic acids and derivatives	γ-氨基丁酸	有机酸及衍生物	16800000
pme3034	131	132.04	[M-H]-	-	ethylmalonate	Organic acids and derivatives	乙基丙二酸	有机酸及衍生物	193000
pme3085	166	165.04	[M+H]+	-	2-(Formylamino)benzoic acid	Organic acids and derivatives	2-(甲酰氨基)苯甲酸	有机酸及衍生物	11600000
pme3096	118	119.02	[M-H]-	C00872	Aminomalonic acid	Organic acids and derivatives	氨基丙二酸	有机酸及衍生物	13400000
pme3146	145.1	146.07	[M-H]-	-	Ureidoisobutyric acid	Organic acids and derivatives	B-脲基异丁酸	有机酸及衍生物	563000
pme3154	147.1	148.07	[M-H]-	-	(Rs)-Mevalonic acid	Organic acids and derivatives	"3,5-二羟基-3-甲基戊酸"	有机酸及衍生物	3130000
pme3309	145.1	146.06	[M-H]-	-	2-Methylglutaric acid	Organic acids and derivatives	2-甲基戊二酸	有机酸及衍生物	601000
pme3346	131.1	132.08	[M-H]-	-	5-hydroxyhexanoic acid	Organic acids and derivatives	5-羟基己酸	有机酸及衍生物	758000
pme3434	211.1	212.07	[M-H]-	-	"Eudesmic acid (3,4,5-trimethoxybenzoic acid)"	Organic acids and derivatives	"3,4,5-三甲氧基苯甲酸"	有机酸及衍生物	9
pme3576	138.1	137.05	[M+H]+	C00108	Anthranilic acid	Organic acids and derivatives	邻氨基苯甲酸	有机酸及衍生物	3010000
pme3719	165.1	166.05	[M-H]-	-	D-Xylonic acid	Organic acids and derivatives	木糖酸	有机酸及衍生物	9180000
pmf0096	88.9	90.03	[M-H]-	C00209	Oxalic acid	Organic acids and derivatives	草酸	有机酸及衍生物	3570000
pmf0132	141	140.01	[M+H]+	-	Coumalic acid	Organic acids and derivatives	香豆酸	有机酸及衍生物	9
pmf0218	167	233.99	[M-3Na+2H]-	-	Phosphoenolpyruvate trisodium salt	Organic acids and derivatives	磷酸烯醇丙酮酸3钠盐	有机酸及衍生物	9
pmf0281	217	194.04	[M+Na]+	C00333	D-Galacturonic acid	Organic acids and derivatives	D-半乳糖醛酸	有机酸及衍生物	1590000
pmf0420	149	150.07	[M-H]-	C15513	Benzyl acetate	Organic acids and derivatives	乙酸苄酯	有机酸及衍生物	118000
pma0134	121	120.04	[M+H]+	-	D(-)-Threose	Carbohydrates	D(-)-苏阿糖	糖类	540000
pma6455	229	230.02	[M-H]-	C00117	Ribulose-5-phosphate	Carbohydrates	核酮糖-5-磷酸	糖类	153000
pmb0786	180	179	[M+H]+	C00329	Glucosamine	Carbohydrates	氨基葡萄糖	糖类	9
pmb2858	665.1	666.1	[M-H]-	C02052	Maltotetraose	Carbohydrates	麦芽四糖	糖类	307000
pmb3088	421.1	422.1	[M-H]-	C00689	Trehalose 6-phosphate	Carbohydrates	海藻糖 6-磷酸	糖类	59500
pme0519	341	342.12	[M-H]-	-	D-(+)-Sucrose	Carbohydrates	D-(+)-蔗糖	糖类	2970000
pme0524	505.2	504.17	[M+H]+	-	D(+)-Melezitose	Carbohydrates	D(+)-松三糖	糖类	9
pme1021	177.1	178.05	[M-H]-	C00198	"D-(+)-Glucono-1,5-lactone"	Carbohydrates	葡糖酸内酯	糖类	427000
pme1846	179	180.06	[M-H]-	C00031	D(+)-Glucose	Carbohydrates	D(+)-无水葡萄糖	糖类	2910000
pme2019	149	150.05	[M-H]-	-	DL-Arabinose	Carbohydrates	DL-阿拉伯糖	糖类	1990000
pme2435	163	164.07	[M-H]-	C01019	L-Fucose	Carbohydrates	L-岩藻糖	糖类	906000
pme2755	222	221.09	[M+H]+	C00140	N-Acetyl-D-glucosamine	Carbohydrates	N-乙酰氨基葡萄糖	糖类	26000000
pme3160	259	260.03	[M-H]-	C00092	D-Glucose 6-phosphate	Carbohydrates	D-葡萄糖-6-磷酸	糖类	3730000
pme3313	259	260.03	[M-H]-	C00085	D-Fructose 6-phosphate	Carbohydrates	D-果糖-6-磷酸	糖类	1650000
pmf0032	341.1	342.12	[M-H]-	-	Galactinol	Carbohydrates	肌醇半乳糖苷	糖类	4290000
pmf0035	259	260.03	[M-H]-	-	Glucose-1-phosphate	Carbohydrates	葡萄糖-1-磷酸	糖类	3710000
pmf0138	179	180.063	[M-H]-	C00159	D-(+)-Mannose	Carbohydrates	甘露糖	糖类	9730000
pmf0139	179	180.06	[M-H]-	C00124	D-(+)-Galactose	Carbohydrates	D-(+)-半乳糖	糖类	5400000
pmf0220	259	303.99	[M-2Na+H]-	-	D-Fructose 6-phosphate-disodium salt	Carbohydrates	D-果糖-6-磷酸二钠盐	糖类	4280000
pmf0272	343.1	378.14	[M+H]+	-	Galactinol Dihydrate	Carbohydrates	肌酸半乳糖苷二水	糖类	4550
pmf0282	341.1	342.12	[M-H]-	C05402	Melibiose	Carbohydrates	蜜二糖水合物	糖类	1120000
pmf0485	503.2	504.17	[M-H]-	C00713	Panose	Carbohydrates	D-潘糖	糖类	278000
pmb1452	275.1	274.1	[M+H]+	-	N-Lauryldiethanolamine	Others	十二烷基乙醇胺	其它	1800000
pmb2507	213.1	214.1	[M-H]-	C00672	2-Deoxyribose 1-phosphate	Others	2-脱氧核糖 1-磷酸	其它	1510000
pmb2685	213.1	214.1	[M-H]-	C00673	2-Deoxyribose 5'-phosphate	Others	2-脱氧核糖 5'-磷酸	其它	821000
pmb3079	300.1	301.1	[M-H]-	C04256	N-Acetylglucosamine 1-phosphate	Others	N-乙酰葡萄糖胺 1-磷酸	其它	263000
pme0534	195.2	196.06	[M-H]-	C00257	Gluconic acid	Others	葡萄糖酸	其它	52300000
pme2255	179	178.05	[M+H]+	C01040	L-Gulonic-γ-lactone	Others	古洛糖酸内酯	其它	548000
pme3705	193.1	194.04	[M-H]-	C00191	D-glucoronic acid	Others	葡萄糖醛酸	其它	809000
pmf0217	259	304.1	[M-2Na+H]-	-	D-Glucose-6-phosphate disodium salt	Others	6-磷酸葡萄糖二钠	其它	6340000
pmb0197	298.1	297.1	[M+H]+	-	N2-methylguanosine	Nucleotide and derivates	甲基鸟苷	核苷酸及衍生物	9
pmb0514	348.1	347.1	[M+H]+	C01367	Adenosine 3'-monophosphate	Nucleotide and derivates	腺苷 3'-单磷酸	核苷酸及衍生物	4460000
pmb0530	664.2	663.2	[M+H]+	C00003	Nicotinic acid adenine dinucleotide	Nucleotide and derivates	烟酰胺腺嘌呤二核苷	核苷酸及衍生物	86200
pmb0532	349.1	348.1	[M+H]+	C00130	Inosine 5'-monophosphate	Nucleotide and derivates	5'-肌苷酸	核苷酸及衍生物	585000
pmb0964	366.2	365.2	[M+H]+	-	iP7G	Nucleotide and derivates	异戊烯基-7-葡糖苷	核苷酸及衍生物	2220000
pmb0981	348.2	347.2	[M+H]+	C00020	Adenosine 5'-monophosphate	Nucleotide and derivates	腺苷 5'-单磷酸	核苷酸及衍生物	8610000
pmb0998	364.1	363.1	[M+H]+	C00144	Guanosine 5'-monophosphate	Nucleotide and derivates	鸟苷 5'-单磷酸	核苷酸及衍生物	1570000
pmb2684	328.1	329.1	[M-H]-	C00575	Cyclic AMP	Nucleotide and derivates	腺苷-3'-5'-环单磷酸	核苷酸及衍生物	1470000
pmb2922	565.1	566.1	[M-H]-	C00029	Uridine 5'-diphospho-D-glucose	Nucleotide and derivates	尿苷 5'-二磷酸葡萄糖	核苷酸及衍生物	77700
pmb2952	251.1	252.1	[M-H]-	C05512	2'-Deoxyinosine	Nucleotide and derivates	2-脱氧肌苷	核苷酸及衍生物	1700000
pmc0066	333.1	332.05	[M+H]+	C06196	2'-Deoxyinosine-5'-monophosphate	Nucleotide and derivates	2'-脱氧肌苷-5'-磷酸	核苷酸及衍生物	75600
pmc0274	167.1	166.1	[M+H]+	C16614	6-Methylmercaptopurine	Nucleotide and derivates	6-甲基巯嘌呤	核苷酸及衍生物	144000000
pmc0281	400.2	399.2	[M+H]+	-	Adenosine O-ribose	Nucleotide and derivates	核糖腺苷酸	核苷酸及衍生物	440000
pmc0304	384.1	383.12	[M+H]+	-	Succinyladenosine	Nucleotide and derivates	琥珀酰腺苷	核苷酸及衍生物	82300000
pme0005	121	120.04	[M+H]+	C15587	Purine	Nucleotide and derivates	嘌呤碱	核苷酸及衍生物	131000
pme0031	127	126.04	[M+H]+	C00178	Thymine	Nucleotide and derivates	胸腺嘧啶	核苷酸及衍生物	925000
pme0033	137	136.04	[M+H]+	C00262	Hypoxanthine	Nucleotide and derivates	次黄嘌呤	核苷酸及衍生物	3120000
pme0038	112	111.04	[M+H]+	C00380	Cytosine	Nucleotide and derivates	胞嘧啶	核苷酸及衍生物	28800000
pme0040	136.1	135.05	[M+H]+	C00147	Adenine	Nucleotide and derivates	腺嘌呤	核苷酸及衍生物	48400000
pme0108	126.1	125.06	[M+H]+	C02376	5-Methylcytosine	Nucleotide and derivates	5-甲基胞嘧啶	核苷酸及衍生物	2780000
pme0166	167.1	166.05	[M+H]+	C16358	1-Methylxanthine	Nucleotide and derivates	1-甲基黄嘌呤	核苷酸及衍生物	9
pme0183	152.1	151.05	[M+H]+	-	2-Hydroxy-6-aminopurine	Nucleotide and derivates	2-羟基-6-氨基嘌呤	核苷酸及衍生物	18300000
pme0230	268.1	267.1	[M+H]+	C00212	Adenosine	Nucleotide and derivates	腺苷	核苷酸及衍生物	720000000
pme0256	151	152.03	[M-H]-	C00385	Xanthine	Nucleotide and derivates	黄嘌呤	核苷酸及衍生物	23900000
pme0258	113	112.03	[M+H]+	C00106	Uracil	Nucleotide and derivates	尿嘧啶	核苷酸及衍生物	6430000
pme0263	259.1	258.09	[M+H]+	-	5-Methyluridine	Nucleotide and derivates	5-甲基尿苷	核苷酸及衍生物	1910000
pme0264	243.1	242.09	[M+H]+	C00214	Thymidine	Nucleotide and derivates	胸苷	核苷酸及衍生物	7660000
pme1063	243.1	244.07	[M-H]-	C00299	Uridine	Nucleotide and derivates	尿嘧啶核苷	核苷酸及衍生物	24400000
pme1109	152	151.05	[M+H]+	C00242	Guanine	Nucleotide and derivates	鸟嘌呤	核苷酸及衍生物	20100000
pme1119	269.1	268.08	[M+H]+	C00294	Inosine	Nucleotide and derivates	肌苷	核苷酸及衍生物	10200000
pme1178	284.1	283.09	[M+H]+	C00387	Guanosine	Nucleotide and derivates	鸟苷	核苷酸及衍生物	281000000
pme1184	268.1	267.1	[M+H]+	C00330	Deoxyguanosine	Nucleotide and derivates	2'-脱氧鸟苷	核苷酸及衍生物	91600000
pme1194	228	227.09	[M+H]+	C00881	Deoxycytidine	Nucleotide and derivates	脱氧胞苷	核苷酸及衍生物	57900000
pme1266	167.1	166.05	[M+H]+	C16357	3-Methylxanthine	Nucleotide and derivates	3-甲基黄嘌呤	核苷酸及衍生物	384000
pme1296	285.1	284.08	[M+H]+	C01762	Xanthosine	Nucleotide and derivates	黄苷	核苷酸及衍生物	96200000
pme1346	300.1	299.09	[M+H]+	-	8-Hydroxyguanosine	Nucleotide and derivates	8-羟基鸟苷	核苷酸及衍生物	3110000
pme1376	308	307.06	[M+H]+	C00239	2'-Deoxycytidine-5'-monophosphate	Nucleotide and derivates	2'-脱氧胞苷-5'-单磷酸	核苷酸及衍生物	832000
pme1378	282.1	281.11	[M+H]+	C02494	1-Methyladenosine	Nucleotide and derivates	1-甲基腺苷	核苷酸及衍生物	5300000
pme1474	298	297.09	[M+H]+	C00170	5'-Deoxy-5'-(methylthio)adenosine	Nucleotide and derivates	5-脱氧-5-甲硫腺苷	核苷酸及衍生物	9
pme2278	362	363.06	[M-H]-	-	Guanosine monophosphate	Nucleotide and derivates	鸟苷单磷酸	核苷酸及衍生物	410000
pme2765	181.1	180.07	[M+H]+	C13747	"1,7-Dimethylxanthine"	Nucleotide and derivates	"1,7-二甲基黄嘌呤"	核苷酸及衍生物	92100
pme2798	165	166.05	[M-H]-	C16353	7-Methylxanthine	Nucleotide and derivates	7-甲基黄嘌呤	核苷酸及衍生物	9
pme2879	141	142.04	[M-H]-	C03088	5-Hydroxymethyluracil	Nucleotide and derivates	5-羟甲基尿嘧啶	核苷酸及衍生物	9
pme3007	403	404.16	[M-H]-	C00015	Uridine 5’-diphosphate	Nucleotide and derivates	尿苷5'-二磷酸	核苷酸及衍生物	33500
pme3104	150	149.07	[M+H]+	C02216	1-Methyladenine	Nucleotide and derivates	1-甲基腺嘌呤	核苷酸及衍生物	201000
pme3174	324	323.05	[M+H]+	C00055	Cytidine 5'-monophosphate (Cytidylic acid)	Nucleotide and derivates	胞苷-5-单磷酸	核苷酸及衍生物	9
pme3184	332	331.07	[M+H]+	C00360	2'-Deoxyadenosine-5'-monophosphate	Nucleotide and derivates	5'-单磷酸-2'-脱氧腺苷	核苷酸及衍生物	6760000
pme3188	323	324.04	[M-H]-	C00105	Uridine 5'-monophosphate	Nucleotide and derivates	5-尿嘧啶核苷酸(5-UMP)	核苷酸及衍生物	2860000
pme3200	74	73.1	[M+H]+	-	1-methylguanidine	Nucleotide and derivates	1-甲基胍	核苷酸及衍生物	347000
pme3337	384	383.11	[M+H]+	-	N6-Succinyl Adenosine	Nucleotide and derivates	N6-琥珀酰腺苷	核苷酸及衍生物	65700000
pme3350	284	283.09	[M+H]+	-	8-Hydroxy-2-deoxyguanosine	Nucleotide and derivates	8-羟基-2-脱氧鸟苷	核苷酸及衍生物	562000
pme3732	244.1	243.09	[M+H]+	C00475	Cytidine	Nucleotide and derivates	胞苷	核苷酸及衍生物	87300000
pme3835	344.2	345.05	[M-H]-	C00942	"Guanosine 3',5'-cyclic monophosphate"	Nucleotide and derivates	"鸟苷 3',5'-环一磷酸"	核苷酸及衍生物	9
pme3882	227.1	228.08	[M-H]-	C00526	2'-Deoxyuridine	Nucleotide and derivates	2'-脱氧尿苷	核苷酸及衍生物	603000
pme3961	252	251.1	[M+H]+	C00559	Deoxyadenosine	Nucleotide and derivates	2-脱氧腺苷	核苷酸及衍生物	310000000
pme3967	312	311.12	[M+H]+	-	2-(dimethylamino)guanosine	Nucleotide and derivates	二甲基鸟苷	核苷酸及衍生物	20500000
pme3968	166	165.07	[M+H]+	C02242	7-methylguanine	Nucleotide and derivates	7-甲基鸟嘌呤	核苷酸及衍生物	70600
pme3970	243	244.07	[M-H]-	C02067	β-Pseudouridine	Nucleotide and derivates	假尿苷	核苷酸及衍生物	2130000
pme3983	269.1	268.08	[M+H]+	-	Hypoxanthine-9-β-D-arabinofuranoside	Nucleotide and derivates	阿糖肌苷	核苷酸及衍生物	37200000
pmf0118	565.1	610.02	[M-2Na+H]-	-	Uridine 5'-diphosphoglucose disodium salt	Nucleotide and derivates	尿甘 5’-二磷酸葡萄糖二钠盐	核苷酸及衍生物	43500
pmf0136	565.1	566.06	[M-H]-	C00029	UDP-α-D-glucose	Nucleotide and derivates	尿苷二磷酸葡萄糖	核苷酸及衍生物	33200
pmf0289	336.2	335.16	[M+H]+	C16427	Riboprine	Nucleotide and derivates	利波腺苷	核苷酸及衍生物	730000
pmf0596	252.2	251.24	[M+H]+	C08431	Cordycepin	Nucleotide and derivates	虫草素	核苷酸及衍生物	7800000
pmb0130	203	202	[M+H]+	-	N-Acetyl tryptamine	Phenolamides	乙酰色胺	酚胺	282000
pmb0488	146.2	145.2	[M+H]+	C00315	Spermidine	Phenolamides	亚精胺	酚胺	9
pmd0017	203	202	[M+H]+	C00750	Spermine	Phenolamides	精胺	酚胺	141000000
pme1841	103	102.12	[M+H]+	C01672	"1,5-Diaminopentane"	Phenolamides	尸胺	酚胺	453000
pme2292	89	88.1	[M+H]+	C00134	Putrescine	Phenolamides	腐胺	酚胺	9
pma2987	142.1	141.1	[M+H]+	C00860	Histidinol	Alcohols	组氨醇	醇类	30900000
pmb0767	302.4	301.4	[M+H]+	-	D-erythro-Dihydrosphingosine	Alcohols	二氢鞘氨醇	醇类	51300
pme0499	181	182.08	[M-H]-	C00794	D-Sorbitol	Alcohols	D-山梨糖醇	醇类	34400000
pme0513	151	152.07	[M-H]-	C00379	Xylitol	Alcohols	木糖醇	醇类	2470000
pme0516	179.2	180.06	[M-H]-	C00137	Inositol	Alcohols	肌醇	醇类	882000
pme1944	183.1	182.08	[M+H]+	C00392	D-Mannitol	Alcohols	D-甘露醇	醇类	7600000
pme2237	181.1	182.08	[M-H]-	C01697	Dulcitol	Alcohols	己六醇	醇类	44800000
pme2256	151.1	152.07	[M-H]-	C01904	D-Arabitol	Alcohols	阿拉伯糖醇	醇类	2620000
pme2529	163.2	164.07	[M-H]-	C07326	"1,5-Anhydro-D-glucitol"	Alcohols	"1,5-酐-D-山梨糖醇"	醇类	1010000
pme3840	204.1	205.13	[M-H]-	C05944	Pantothenol	Alcohols	DL-泛酰醇	醇类	150000
pmf0068	183.2	182.08	[M+H]+	C00392	Mannitol	Alcohols	甘露醇	醇类	2850000
pmf0174	157.2	158.28	[M-H]-	C01633	1-Decanol	Alcohols	1-癸醇	醇类	50900000
pmf0283	121.1	122.06	[M-H]-	-	Meso-Erythritol	Alcohols	内消旋-赤藓醇	醇类	63200
pmb0382	339.1	338.1	[M+H]+	-	O-Feruloyl 4-hydroxylcoumarin	Phenylpropanoids	阿魏酸 4-羟基香豆素	苯丙素	9
pmb0478	455.1	454.1	[M+H]+	-	Coumarin O-rutinoside	Phenylpropanoids	对香豆酸 O-鼠李糖基-O-己糖苷	苯丙素	9
pme0300	149.1	148.05	[M+H]+	C00423	trans-Cinnamate	Phenylpropanoids	反式肉桂酸	苯丙素	1150000
pme0388	183.1	182.06	[M+H]+	C05582	Homovanillic acid	Phenylpropanoids	高香草酸	苯丙素	455000
pme0391	177	176.05	[M+H]+	C03081	4-Methylumbelliferone	Phenylpropanoids	4-甲基伞形酮	苯丙素	868000
pme0419	167.1	166.06	[M+H]+	C01744	3-(4-Hydroxyphenyl)propionic acid	Phenylpropanoids	对羟基苯丙酸	苯丙素	994000
pme0423	195.1	194.06	[M+H]+	-	3-Hydroxy-4-methoxycinnamic acid	Phenylpropanoids	异阿魏酸	苯丙素	9
pme0429	239.1	238.08	[M+H]+	-	"3,4,5-Trimethoxycinnamic acid"	Phenylpropanoids	"3,4,5-三甲氧基肉桂酸"	苯丙素	128000
pme1436	163	164.05	[M-H]-	C00811	p-Coumaric acid	Phenylpropanoids	4-香豆酸	苯丙素	790000
pme2996	161	162.03	[M-H]-	C20414	4-Hydroxycoumarin	Phenylpropanoids	4-羟基香豆素	苯丙素	520000
pme3367	161	160.05	[M+H]+	-	6-MethylCoumarin	Phenylpropanoids	6-甲基香豆素	苯丙素	9
pme3413	147.1	146.04	[M+H]+	C05851	Coumarin	Phenylpropanoids	香豆素	苯丙素	218000
pme3456	149.1	148.05	[M+H]+	-	p-Coumaraldehyde	Phenylpropanoids	香豆醛	苯丙素	9
pmf0013	177.1	176.17	[M+H]+	C09268	7-Methoxycoumarin	Phenylpropanoids	7-甲氧基香豆素	苯丙素	612000
pmf0320	197.1	196.07	[M+H]+	C10664	Acetosyringone	Phenylpropanoids	乙酰丁香酮	苯丙素	129000
pmf0440	163.1	162.07	[M+H]+	C10475	4-Methoxycinna Maldehyde	Phenylpropanoids	4-甲氧基肉桂醛	苯丙素	593000
pmf0591	149.2	148.16	[M+H]+	C10438	Cinnamic acid	Phenylpropanoids	肉桂酸	苯丙素	1000000
pmb0115	225.1	224.1	[M+H]+	C02794	3-Hydroxykynurenine	Amino acid and derivatives	3-羟基犬尿素	氨基酸及衍生物	668000
pmb0449	162.1	161.1	[M+H]+	C00956	2-Aminoadipic acid (L-Homoglutamic acid)	Amino acid and derivatives	2-氨基己二酸 (L-高谷氨酸)	氨基酸及衍生物	2780000
pmb0464	458.1	457.1	[M+H]+	-	Aspartic acid di-O-glucoside	Amino acid and derivatives	天门冬氨酸 二葡糖苷	氨基酸及衍生物	2980000
pmb0962	235.1	234.1	[M+H]+	-	Lysine butyrate	Amino acid and derivatives	赖氨酸丁酸	氨基酸及衍生物	593000
pmb2855	307	308	[M-H]-	-	L-Glutamine O-hexside	Amino acid and derivatives	L-谷氨酰胺 O-己糖苷	氨基酸及衍生物	511000
pmb2857	308.1	309.1	[M-H]-	-	L-Glutamic acid O-glucoside	Amino acid and derivatives	L-谷氨酸 O-己糖苷	氨基酸及衍生物	672000
pmb2873	214.1	215.1	[M-H]-	-	3-(2-Naphthyl)-D-alanine	Amino acid and derivatives	3-(2-萘基)-D-丙氨酸	氨基酸及衍生物	471000
pme0004	190.1	189.11	[M+H]+	C02427	L-Homocitrulline	Amino acid and derivatives	L-高瓜氨酸	氨基酸及衍生物	2200000
pme0006	116.1	115.06	[M+H]+	C00148	L-Proline	Amino acid and derivatives	L-脯氨酸	氨基酸及衍生物	400000000
pme0008	176.1	175.1	[M+H]+	C00327	L-Citrulline	Amino acid and derivatives	L-瓜氨酸	氨基酸及衍生物	4560000
pme0010	106	105.04	[M+H]+	C00065	L-Serine	Amino acid and derivatives	L-丝氨酸	氨基酸及衍生物	3540000
pme0011	132	133.04	[M-H]-	C00049	L-Aspartic acid	Amino acid and derivatives	L-天冬氨酸	氨基酸及衍生物	10300000
pme0013	146.1	147.05	[M-H]-	C00025	L-Glutamic acid	Amino acid and derivatives	L-谷氨酸	氨基酸及衍生物	16300000
pme0016	241	240.02	[M+H]+	C00491	L-(-)-Cystine	Amino acid and derivatives	L-(-)-胱氨酸	氨基酸及衍生物	368000
pme0018	130.1	131.09	[M-H]-	C00123	L-Leucine	Amino acid and derivatives	L-亮氨酸	氨基酸及衍生物	8410000
pme0021	166	165.08	[M+H]+	C00079	L-Phenylalanine	Amino acid and derivatives	L-苯丙氨酸	氨基酸及衍生物	501000000
pme0023	120	119.06	[M+H]+	C00188	L-Threonine	Amino acid and derivatives	L-(-)-苏氨酸	氨基酸及衍生物	16400000
pme0025	209.1	208.08	[M+H]+	C00328	L-Kynurenine	Amino acid and derivatives	L-犬尿氨酸	氨基酸及衍生物	3010000
pme0026	147	146.11	[M+H]+	C00047	L-(+)-Lysine	Amino acid and derivatives	L-(+)-赖氨酸	氨基酸及衍生物	123000000
pme0030	182.1	181.07	[M+H]+	C00082	L-(-)-Tyrosine	Amino acid and derivatives	L-(-)-酪氨酸	氨基酸及衍生物	341000000
pme0037	156.1	155.07	[M+H]+	C00135	L-Histidine	Amino acid and derivatives	L-组氨酸	氨基酸及衍生物	6260000
pme0039	118.1	117.08	[M+H]+	C00183	L-Valine	Amino acid and derivatives	L-缬氨酸	氨基酸及衍生物	438000000
pme0043	175	174.11	[M+H]+	C00062	L-(+)-Arginine	Amino acid and derivatives	L-(+)-精氨酸	氨基酸及衍生物	119000000
pme0056	145.1	146.06	[M-H]-	-	"2,3-dimethylsuccinic acid"	Amino acid and derivatives	"2,3-二甲基丁氨酸"	氨基酸及衍生物	1020000
pme0057	136	135.04	[M+H]+	C00155	DL-Homocysteine	Amino acid and derivatives	L-高半胱氨酸	氨基酸及衍生物	3270000
pme0066	116.1	117.05	[M-H]-	C00581	Guanidineacetic acid	Amino acid and derivatives	乙酸胍	氨基酸及衍生物	388000
pme0075	188.1	189.06	[M-H]-	C00624	N-Acetyl-L-glutamic acid	Amino acid and derivatives	N-乙酰-L-谷氨酸	氨基酸及衍生物	1390000
pme0109	212.2	211.08	[M+H]+	C07194	"(-)-3-(3,4-Dihydroxyphenyl)-2-methylalanine"	Amino acid and derivatives	"(-)-3-(3,4-二羟基苯基)-2-甲基丙氨酸"	氨基酸及衍生物	811000
pme0113	251.3	250.06	[M+H]+	C00669	γ-Glu-Cys	Amino acid and derivatives	γ-L-谷氨酸-L-半胱氨酸	氨基酸及衍生物	518000
pme0120	118.2	117.08	[M+H]+	C00431	5-Aminovaleric acid	Amino acid and derivatives	5-氨基戊酸	氨基酸及衍生物	820000
pme0122	189.2	188.12	[M+H]+	C02727	N6-Acetyl-L-lysine	Amino acid and derivatives	N6-乙酰-L-赖氨酸	氨基酸及衍生物	11900000
pme0124	173.2	172.08	[M+H]+	-	Glycyl-L-proline	Amino acid and derivatives	甘氨酰-L-脯氨酸	氨基酸及衍生物	1220000
pme0129	161.2	160.08	[M+H]+	C00993	D-Alanyl-D-Alanine	Amino acid and derivatives	D-丙氨酰-D-丙氨酸	氨基酸及衍生物	337000
pme0133	281.3	280.11	[M+H]+	-	Asp-phe	Amino acid and derivatives	天冬氨酸-苯丙氨酸	氨基酸及衍生物	1680000
pme0138	189.2	188.08	[M+H]+	-	Nα-Acetyl-L-glutamine	Amino acid and derivatives	N-乙酰-L-谷氨酰胺	氨基酸及衍生物	10300000
pme0161	118.1	119.06	[M-H]-	C00263	L-Homoserine	Amino acid and derivatives	同型丝氨酸	氨基酸及衍生物	246000
pme0170	217.1	216.12	[M+H]+	-	Nα-Acetyl-L-arginine	Amino acid and derivatives	Nα-乙酰-L-精氨酸	氨基酸及衍生物	7670000
pme0171	158.1	159.09	[M-H]-	-	N-Isovaleroylglycine	Amino acid and derivatives	N-异戊酰氨基乙酸	氨基酸及衍生物	32500
pme0174	132.1	131.06	[M+H]+	-	N-Propionylglycine	Amino acid and derivatives	丙甘氨酸	氨基酸及衍生物	6060000
pme0181	170.1	169.09	[M+H]+	C01152	1-Methylhistidine	Amino acid and derivatives	1-甲基组氨酸	氨基酸及衍生物	1370000
pme0191	189.1	188.12	[M+H]+	C02155	N-Glycyl-L-leucine	Amino acid and derivatives	N-甘氨酰-L-亮氨酸	氨基酸及衍生物	14900000
pme0193	147.1	146.07	[M+H]+	C00064	L-Glutamine	Amino acid and derivatives	L-谷氨酰胺	氨基酸及衍生物	154000000
pme0195	120	121.02	[M-H]-	C00097	L-Cysteine	Amino acid and derivatives	L-半胱氨酸	氨基酸及衍生物	748000
pme0225	133.1	132.05	[M+H]+	C00152	L-Asparagine	Amino acid and derivatives	L-天冬酰胺	氨基酸及衍生物	2930000
pme0231	247.1	246.1	[M+H]+	-	N-(3-Indolylacetyl)-L-alanine	Amino acid and derivatives	N-(3-吲哚乙酰基)-L-丙氨酸	氨基酸及衍生物	95200
pme0247	130.1	131.06	[M-H]-	C01157	trans-4-Hydroxy-L-proline	Amino acid and derivatives	反-4-羟基-L-脯氨酸	氨基酸及衍生物	36200
pme0253	174.1	173.11	[M+H]+	C02710	N-Acetyl-l-leucine	Amino acid and derivatives	N-乙酰-L-亮氨酸	氨基酸及衍生物	2320000
pme0279	189.1	190.1	[M-H]-	C00666	"2,6-Diaminooimelic acid"	Amino acid and derivatives	"2,6-二氨基庚二酸"	氨基酸及衍生物	83300
pme1002	138.1	137.08	[M+H]+	C00483	L-Tyramine	Amino acid and derivatives	酪胺	氨基酸及衍生物	106000
pme1086	306	307.08	[M-H]-	C00051	Glutathione reduced form	Amino acid and derivatives	谷胱甘肽还原型	氨基酸及衍生物	9
pme1104	130.1	131.1	[M-H]-	C00407	L-Isoleucine	Amino acid and derivatives	L-异亮氨酸	氨基酸及衍生物	4750000
pme1228	221.1	220.09	[M+H]+	C00643	5-Hydroxy-L-tryptophan	Amino acid and derivatives	5-羟基色氨酸	氨基酸及衍生物	92900
pme1242	322.4	321.1	[M+H]+	C11347	S-(methyl)glutathione	Amino acid and derivatives	S-甲基谷胱甘肽	氨基酸及衍生物	9
pme1286	385	384.12	[M+H]+	C00021	S-(5'-Adenosy)-L-homocysteine	Amino acid and derivatives	S-(5-腺苷)-L-高半胱氨酸	氨基酸及衍生物	9
pme1313	237.1	236.08	[M+H]+	C02700	N'-Formylkynurenine	Amino acid and derivatives	N’-甲酰基犬尿氨酸	氨基酸及衍生物	334000
pme1368	128	129.08	[M-H]-	C00408	L-Pipecolic acid	Amino acid and derivatives	L-哌啶酸	氨基酸及衍生物	1120000
pme1712	275	276.13	[M-H]-	C00449	L-Saccharopine	Amino acid and derivatives	L-酵母氨酸	氨基酸及衍生物	4920000
pme1987	88	89.05	[M-H]-	C00041	L-Alanine	Amino acid and derivatives	L-丙氨酸	氨基酸及衍生物	18600
pme2046	170	169.18	[M+H]+	-	3-N-Methyl-L-histidine	Amino acid and derivatives	3-N-甲基-L-组氨酸	氨基酸及衍生物	9
pme2054	205.1	204.09	[M+H]+	C00078	L-Tryptophan	Amino acid and derivatives	L-色氨酸	氨基酸及衍生物	65800000
pme2122	112.1	111.08	[M+H]+	C00388	Histamine	Amino acid and derivatives	组胺	氨基酸及衍生物	25500000
pme2142	173.1	174.1	[M-H]-	C01047	L-Theanine	Amino acid and derivatives	L-茶氨酸	氨基酸及衍生物	9
pme2430	224.1	223.09	[M+H]+	-	N-Acetyl-L-tyrosine	Amino acid and derivatives	N-乙酰-L-酪氨酸	氨基酸及衍生物	6120000
pme2527	133	132.16	[M+H]+	C00077	L(+)-Ornithine	Amino acid and derivatives	L-鸟氨酸	氨基酸及衍生物	690000
pme2559	174	175.05	[M-H]-	C01042	N-Acetylaspartate	Amino acid and derivatives	N-乙酰天冬氨酸	氨基酸及衍生物	627000
pme2566	217	218.09	[M-H]-	C03740	(5-L-Glutamyl)-L-amino acid	Amino acid and derivatives	5-L-谷氨酰-L-丙氨酸	氨基酸及衍生物	386000
pme2617	166	165.05	[M+H]+	-	Methionine sulfoxide	Amino acid and derivatives	蛋氨酸亚砜	氨基酸及衍生物	4630000
pme2634	118	117.08	[M+H]+	C01826	Dl-Norvaline	Amino acid and derivatives	缬氨酸	氨基酸及衍生物	408000000
pme2698	313.4	312.15	[M+H]+	-	Phe-Phe	Amino acid and derivatives	L-苯丙氨酸-L-苯丙氨酸	氨基酸及衍生物	9
pme2735	399.2	398.14	[M+H]+	C00019	S-(5'-Adenosyl)-L-methionine	Amino acid and derivatives	S-腺苷蛋氨酸	氨基酸及衍生物	167000
pme2758	162	163.13	[M-H]-	C03079	4-Hydroxy-L-glutamic acid	Amino acid and derivatives	4-羟基-L-谷氨酸	氨基酸及衍生物	66900
pme2773	223	222.07	[M+H]+	C02291	L-Cystathionine	Amino acid and derivatives	L-胱硫醚	氨基酸及衍生物	9
pme2853	172.1	173.11	[M-H]-	-	Hexanoyl glycine	Amino acid and derivatives	己酰甘氨酸	氨基酸及衍生物	34700
pme2867	158.1	157.07	[M+H]+	C20828	3-Methylcrotonyl glycine	Amino acid and derivatives	N-(3-甲基-1-氧代-2-丁烯酸)氨基乙酸	氨基酸及衍生物	9
pme2890	269	268.06	[M+H]+	C01817	L-Homocystine	Amino acid and derivatives	L-高胱氨酸	氨基酸及衍生物	118000
pme2914	161	162.05	[M-H]-	C03761	"3-Hydroxy-3-methylpentane-1,5-dioic acid"	Amino acid and derivatives	3-羟基-3-甲基谷氨酸	氨基酸及衍生物	8040000
pme3017	104	103.06	[M+H]+	C03665	2-Aminoisobutyric acid	Amino acid and derivatives	2-氨基异丁酸	氨基酸及衍生物	42600000
pme3033	104	103.06	[M+H]+	C01026	"N,N-Dimethylglycine"	Amino acid and derivatives	"N,N-二甲基甘氨酸"	氨基酸及衍生物	10100000
pme3038	130	129.04	[M+H]+	C01879	5-oxoproline	Amino acid and derivatives	5-氧化脯氨酸	氨基酸及衍生物	195000000
pme3179	179	178.04	[M+H]+	C01419	CYS-GLY	Amino acid and derivatives	半胱氨酰甘氨酸	氨基酸及衍生物	52300
pme3194	118	117.04	[M+H]+	-	N-acetylglycine	Amino acid and derivatives	N-乙酰基甘氨酸	氨基酸及衍生物	17100000
pme3384	162	161.07	[M+H]+	-	N-Acetylthreonine	Amino acid and derivatives	N-乙酰基苏氨酸	氨基酸及衍生物	460000
pme3388	189	188.13	[M+H]+	C01924	H-HomoArg-OH	Amino acid and derivatives	高精氨酸	氨基酸及衍生物	1110000
pmf0018	102.1	101.05	[M+H]+	-	1-Aminocyclopropanecarboxylic acid	Amino acid and derivatives	1-氨基环丙烷羧酸	氨基酸及衍生物	11800000
pmf0292	302.3	301.3	[M+H]+	C00836	D-erythro-sphinganine	Amino acid and derivatives	刺氨酸	氨基酸及衍生物	68400
pmf0442	208.1	207.09	[M+H]+	C03519	N-Acetyl-L-phenylalanine	Amino acid and derivatives	N-乙酰基-L-苯丙氨酸	氨基酸及衍生物	5990000
pmf0448	162.1	161.05	[M+H]+	C16759	S-Allyl-L-cysteine	Amino acid and derivatives	S-烯丙基-L-半胱氨酸	氨基酸及衍生物	9
pmf0470	132.1	131.06	[M+H]+	C03440	cis-4-Hydroxy-D-proline	Amino acid and derivatives	顺式-4-羟基-D-脯氨酸	氨基酸及衍生物	1120000
pmf0585	116.1	115.06	[M+H]+	C16435	Proline	Amino acid and derivatives	DL-脯氨酸	氨基酸及衍生物	401000000
pmf0587	132	133.04	[M-H]-	C16433	Aspartic acid	Amino acid and derivatives	DL-天冬氨酸	氨基酸及衍生物	8810000
pmf0589	146	147.05	[M-H]-	-	Glutamic acid	Amino acid and derivatives	DL-谷氨酸	氨基酸及衍生物	16900000
pmf0593	118.2	117.15	[M+H]+	C06417	D-(-)-Valine	Amino acid and derivatives	D-缬氨酸	氨基酸及衍生物	214000000
pmf0594	166.2	165.19	[M+H]+	C02265	D-(+)-Phenylalanine	Amino acid and derivatives	D-苯丙氨酸	氨基酸及衍生物	367000000
